# Supplementary material
Source: PubMed Central journal article supplement (PMC9708579)
Supplement: 41380_2022_1567_MOESM5_ESM.pdf [file 41380_2022_1567_MOESM5_ESM.pdf]

1 **KEY RESOURCES TABLE**

| REAGENT OR RESOURCE                  | SOURCE                                           | IDENTIFIER                               |
|--------------------------------------|--------------------------------------------------|------------------------------------------|
| Chemicals and antibodies             |                                                  |                                          |
| Metranidazole                        | Sigma Aldrich                                    | M3761 CAS #: 443-48-1                    |
| Antalarmin                           | Sigma Aldrich                                    | A8727 CAS #: 220953-69-5                 |
| Mivacurium chloride                  | Abcam                                            | ab143667 CAS #: 106861-44-3              |
| Lipophilic dye DiD                   | ThermoFisher                                     | V22887 CAS # : 127274-91-3               |
| Alexa-568 conjugated Dextran -10Kd   | ThermoFisher                                     | D22912                                   |
| Tubocurarine                         | Sigma-Aldrich                                    | T2379, CAS # 6989-98-6                   |
| anti-GFP antibodies                  | Abcam                                            | RRID:AB_300798                           |
| anti-ACTH antibodies                 | National Hormone & Peptide Program, Torrance, CA | RRID:AB_2313902                          |
| anti-tyrosine hydroxylase antibodies | Sigma-Aldrich                                    | RRID:AB_390204                           |
| anti-5HT antibodies                  | Immunostar                                       | RRID:AB_572263                           |
| anit-chicken Alexa 488 antibodies    | ThermoFisher                                     | A-11039                                  |
| anti-rabbit Alexa 568 antibodies     | ThermoFisher                                     | A-11036                                  |
|                                      |                                                  |                                          |
| Primers                              |                                                  |                                          |
| Genotype: crhb For                   | Integrated DNA Technologies                      | 5'-CCGAGACATCCCAGTATCCA-3'               |
| Genotype: crhb Rev                   | Integrated DNA Technologies                      | 5'-TGGCCATCTCCAGTACTTCTC-3'              |
|                                      |                                                  |                                          |
| Plasmids                             |                                                  |                                          |
| pmTol2-crf:Gal4FF                    | This paper                                       | SG1347_13-2                              |
| UAS:Synaptophysin-RFP                | <sup>1</sup>                                     | p362 [tol1] 14xUAS-Synaptophysin-TagRFPT |
| pmTol2-UAS:PSD95-GFP                 | <sup>2</sup> and This paper                      |                                          |
|                                      |                                                  |                                          |
| Animal, Transgenic                   |                                                  |                                          |
| Zebrafish: Tg(elavl3:H2BGCaMP6s)     | <sup>3</sup>                                     | JF5                                      |
| Zebrafish: Tg(crf:Gal4FF)            | <sup>4</sup> and this paper                      | <i>s2510</i>                             |
| Zebrafish: Tg(pomc:Gal4FF)           | <sup>4</sup> and this paper                      | <i>s2511</i>                             |
| Zebrafish: Tg(oxt:Gal4)              | <sup>5</sup>                                     | N/A                                      |
| Zebrafish: Tg(sst3:Gal4)             | <sup>6</sup>                                     | Mpn219                                   |
| Zebrafish: Tg(otpba:Gal4)            | <sup>7</sup>                                     | Zc57                                     |
| Zebrafish: Tg(UAS:GFP)               | <sup>8</sup>                                     | Nns19                                    |
| Zebrafish: Tg(UAS:Chr2-mCherry)      | <sup>9</sup>                                     | Mpn134                                   |
| Zebrafish: Tg(UAS:NTR-mCherry)       | <sup>10</sup>                                    | Rw0144                                   |
|                                      |                                                  |                                          |
| Animal, mutant                       |                                                  |                                          |
| <i>crhb</i>                          | This study                                       | <i>ct862</i>                             |
|                                      |                                                  |                                          |

|                      |                        |                                                                                                         |
|----------------------|------------------------|---------------------------------------------------------------------------------------------------------|
| Software             |                        |                                                                                                         |
| Noldus Ethovision XT | Noldus                 | <a href="https://www.noldus.com/ethovision-xt">https://www.noldus.com/ethovision-xt</a>                 |
| Imaris               | Oxford Instruments     | <a href="https://imaris.oxinst.com/">https://imaris.oxinst.com/</a>                                     |
| Fiji (image J)       | <sup>11</sup>          | <a href="http://fiji.sc/">http://fiji.sc/</a>                                                           |
| CMTK                 | <sup>12</sup>          | <a href="https://www.nitrc.org/projects/cmtk/">https://www.nitrc.org/projects/cmtk/</a>                 |
| CalMaN               | <sup>13</sup>          | <a href="https://github.com/flatironinstitute/CalMaN">https://github.com/flatironinstitute/CalMaN</a>   |
| Python 3.5           | Python                 | <a href="https://www.python.org/">https://www.python.org/</a>                                           |
| Numpy                | <sup>14</sup>          | <a href="https://www.numpy.org/">https://www.numpy.org/</a>                                             |
| Scipy                | <sup>15</sup>          | <a href="https://scipy.org/">https://scipy.org/</a>                                                     |
| Scikit Image 0.15.0  | <sup>16</sup>          | <a href="https://scikit-image.org/">https://scikit-image.org/</a>                                       |
| Scikit Learn 0.17.0  | <sup>17</sup>          | <a href="http://scikit-learn.org/">http://scikit-learn.org/</a>                                         |
| Statsmodels 0.8.0    | <sup>18</sup>          | <a href="http://www.statsmodels.org/">http://www.statsmodels.org/</a>                                   |
| Matplotlib 3.1.1     | <sup>19</sup>          | <a href="https://matplotlib.org/">https://matplotlib.org/</a>                                           |
| Heapq                | Python Doc             | <a href="https://docs.python.org/3/library/heapq.html">https://docs.python.org/3/library/heapq.html</a> |
| Seaborn 0.9.0        | Seaborn                | <a href="https://seaborn.pydata.org/">https://seaborn.pydata.org/</a>                                   |
| Bokeh 1.2.0          | Bokeh Development Team | <a href="https://bokeh.pydata.org/en/latest/">https://bokeh.pydata.org/en/latest/</a>                   |
| Jupyter              | <sup>20</sup>          | <a href="https://jupyter.org/">https://jupyter.org/</a>                                                 |
| Pandas               | <sup>21</sup>          | <a href="https://pandas.pydata.org/">https://pandas.pydata.org/</a>                                     |

2

3

### Supplementary Methods

#### 4 *Plasmid constructs and the crf transgenic line establishment*

5 Although the *Tg[crf-gal4FF]* was previously validated and used in our study <sup>4</sup>, detailed methodology on how  
6 it was generated warrants description here. Conserved elements from the *crhb* locus were identified via UCSC  
7 Genome Browser conservation tracks (UCSC Genome Browser on Zebrafish July 2007 Zv7/danRer5) based  
8 on multi-species sequence alignments <sup>22</sup>. These elements were amplified using the PCR primers listed in Fig.  
9 S1B and digested with restriction enzymes to generate sticky ends. Fragments were randomly ligated with  
10 pMiniTol2 vector <sup>23</sup> upstream of tdTOM. Resulting clones were checked for insert by restriction enzyme digest.  
11 Clones with more than 1000 bp inserts were microinjected in zebrafish embryos and screened for neuronal  
12 expression 48 hpf onwards. Total 28 clones were tested. The expression was compared with endogenous  
13 *crhb* expression. One of the clones (13-2), which contained Enhancer 5, Enhancer 2 (partial), and Enhancer  
14 1, showed expression in the hypothalamus similar to endogenous *crhb* expression. For generating CRF<sup>Hy</sup>  
15 transgenic lines, tdTOM was replaced with Gal4FF and injected in UAS-GFP transgenic embryos and raised  
16 to adulthood. The F0 fish were crossed with UAS-GFP to identify the transgenic carriers. Two F0 founders  
17 (out of 30 screened) showing identical expression were used to establish the CRF<sup>Hy</sup> transgenic line. The UAS  
18 reporter lines were generated by crossing CRF<sup>Hy</sup>-gal4FF with corresponding UAS lines.

19 *Plasmid constructs and the pomc transgenic line establishment*

20 The 1080 bp fragment containing 1029 bp *pomc* promoter fragment was amplified from the *pomc*-GFP  
21 construct (a gift from Dr. Ning-Ai Liu)<sup>24</sup> using the vector primer 5'- CCCCCTCGAGGTGACG-3' and *pomc*  
22 primer upstream of ATG: 5'-ATCCTCACTCCCCTCACCAT-3'. The PCR product was cloned upstream of  
23 Gal4 in pminiTo2 vector (a gift from Stephen Ekker, Addgene plasmid # 31829; <http://n2t.net/addgene:31829>;  
24 RRID: Addgene\_31829)<sup>23</sup>. The resultant construct was injected into transgenic embryos carrying UAS-GFP  
25 to establish *Tg[pomc:gal4FF]*.

26 *Cortisol extraction*

27 Cortisol extraction and analysis performed as previously described<sup>25</sup>. For each treatment group, 6 replicates  
28 (each carrying 10 larvae) were used for cortisol extraction. Cortisol levels were normalized to total protein and  
29 plotted as ratio of non-stressed vs stressed within each treatment group.

30 *Neuronal ablation*

31 Gal4 transgenic lines were crossed with UAS::NTR-mCherry<sup>10</sup> to generate transgenic larvae expressing  
32 UAS::NTR-mCherry in specific neuronal subtypes. Transgenic and non-transgenic larvae were screened and  
33 separated at 3 dpf and incubated at 28 °C with 14-10 hours light/dark cycle. Larvae were treated with  
34 metronidazole (4.5 mM or 9.0 mM MTZ) or 0.2% DMSO from 4dpf to 6dpf with daily change of embryo  
35 medium. At 6dpf, larvae were transferred to E3 medium and behavioral recording was carried out on 7 dpf.

36 *Immunostaining*

37 Transgenic larvae expressing GFP in CRF<sup>Hy</sup> neurons were treated with 0.003% PTU from 24hpf onwards and  
38 fixed with 4% PFA at 5dpf. Larvae were treated with methanol and rehydrated in PBT (PBS with 0.5% Triton  
39 X-100). Larval brain was exposed by removing eyes and jaw cartilage. Dissected larvae were blocked in  
40 blocking solution (5% normal goat sue rum in PBT) at room temperature for 3-4 hours and then incubated  
41 with primary antibodies, Anti-TH at 1:1000 dilution, or Anti-5HT 1:10000 dilution, and Anti-GFP 1:1000 dilution  
42 for 3 days at 4 °C. Larvae were washed 8 times with PBT at room temperature and incubated with secondary  
43 antibody anti-chicken-Alexa 488 and anti-rabbit-Alex568 at 1:500 dilution overnight at 4 °C. Immunostained  
44 larvae were washed 5 times with PBT and mounted in 70% glycerol in PBS for imaging.

45 *In vivo recording of CRF<sup>Hy</sup> channelrhodopsin-expressing neurons*

46 Neurons were recorded from 5 d.p.f. *Tg(crf:Gal4FF; UAS:ChR2-mCherry)* larvae. Larval zebrafish were  
47 anesthetized in 0.1% MS-222 (Sigma) and paralyzed with 5mM tubocurarine (Sigma-Aldrich T2379) diluted  
48 in extracellular recording solution (134 mM NaCl, 2.9 mM KCl, 2.1 mM CaCl<sub>2</sub>, 1.2 mM MgCl<sub>2</sub>, 10 mM glucose,  
49 10 mM HEPES, pH7.8). Fish were mounted on their side, and mCherry+ neurons were visually identified  
50 using an upright microscope (Olympus BX51WI) and CCD camera (Q-Imaging RoleraXR). Recording pipettes  
51 with 9–12-MΩ tip resistance were used, filled with external solution. After reaching a ≥1-GΩ seal, the internal

52 membrane was not ruptured to maintain the cell attached configuration (voltage clamp, no holding voltage).  
53 Light was delivered with a Spectra X LED light engine (Lumencor) via a 475/35 nm filter and ×40/0.8 NA  
54 water-immersion objective (3 mW power measured from objective). Light stimulation was applied to neurons  
55 with spontaneous spiking at baseline (10 ms pulses separated by 1 s, a 3 s pause, and 10 s of 100 ms pulses  
56 at 5 Hz).

## 57 *Behavior*

### 58 ---*Camouflage assay*

59 Camouflage assay was performed as previously described<sup>26</sup>. For each group 16 larvae were used.

### 60 ---*Light dark preference behavior*

61 Light dark preference behavior was performed as previously described<sup>25</sup>. Larvae were raised at 28 °C with  
62 14-10 hours light/dark cycle on light blue background. All behavior recording was performed with 7 dpf larvae  
63 between 9.00 AM to 4.00 PM. Larvae were transferred to behavior recording room and left on light blue pad  
64 for one hour. Recording was performed in batches of 8 larvae per experimental group. Each behavior chamber  
65 had the dimension of 4 cm x 4 cm x 1 cm, with walls covered with white and black tapes (Fig 1A). All 8 larvae  
66 were pipetted into the center of the behavior recording chambers kept on the blue background. All chambers  
67 with larvae were transferred on to the recording stage made by covering the white light transilluminator with  
68 clear transparent and black (infrared transparent) acrylic strips such that each chamber is divided into light  
69 and dark zone from the bottom matching with the tape color on the walls of chamber. Recording was  
70 performed with a Panasonic CCD camera fitted with the IR filter connected to computer. Four chambers were  
71 recorded simultaneously from a single camera with Noldus Ethovision Recorder. Recording was captured for  
72 8 minutes at 30fps and stored in MPEG4 format for further analysis with Noldus Ethovision XT software.

73 For CRF receptor antagonist, AB-wildtype larvae were raised at 28 °C with 14-10 hours light/dark cycle  
74 from 3 dpf to 7 dpf in E3 medium. Larvae were incubated with 1uM Antalarmin (CRFR1 antagonist) or 0.2%  
75 DMSO in E3 medium for one hour. Larval behavior was recorded in E3 buffer with Antalarmin.

76 The *crhb*<sup>-/-</sup> CRISPR knockout and sibling larvae were obtained by crossing heterozygous *crhb*<sup>+/-</sup> adults  
77 and raising at 28 °C with 14-10 hours light/dark cycle from 3 dpf to 7 dpf in E3 medium. Larvae were genotyped  
78 individually after behavior recording and grouped accordingly for analysis. Genotyping PCR with primer  
79 flanking the indel site showed two bands in with heterozygous larvae corresponding to homoduplex and  
80 heteroduplex. The second round PCR was performed by mixing the wildtype DNA to differentiate *crhb*<sup>-/-</sup>  
81 mutant vs *crhb*<sup>+/+</sup> wildtype. The two round PCR method was validated by sequencing the PCR product (Fig.  
82 S3).

### 83 ---*Behavioral preference upon optogenetic stimulation*

84 CRF<sup>Hy</sup>:Gal4FF; UAS::GFP transgenic line was crossed with UAS:: ChR2-mCherry <sup>9</sup> to generate  
85 CRF<sup>Hy</sup>::Gal4FF; UAS:: ChR2-mCherry transgenic line. Embryos obtained from in-cross of transgenic  
86 CRF<sup>Hy</sup>:Gal4FF; UAS::ChR2-mCherry heterozygous, were screened for mCherry expression at 3 dpf under  
87 stereo fluorescence microscope. Transgenic larvae (mCherry positive) and non-transgenic (mCherry negative)  
88 were separately incubated at 28 °C with 14-10 hours light/dark cycle on grey metallic background and  
89 transferred to behavior recording room at 7 dpf. Behavior chambers were similar to the light/dark choice  
90 behavior chamber with side wall covered with white tape. Larvae were individually transferred to 8 behavior  
91 chambers on grey metallic background. The recording stage was modified for optogenetic behavior by placing  
92 a 9 cm(L) x 9 cm (W)x 6.5 cm(H) box on a transilluminator with center compartment of 9 cm(L) x 4.5 cm(W)  
93 carrying five Blue LEDs (Chanzon 3 W Royal Blue 440 nm-450 nm / 400 mA-500 mA / DC 3 V-3.4 V / 3 Watt)  
94 mounted on a heat sink (Chanzon 1 W 3 W 5 W LED Heat Sink, 2 pin White, Aluminum Base Plate). The top  
95 of the box was covered with clear acrylic and a diffuser (Rosco Cinegel Tough Rolux) and blue filter (Lee  
96 Filters Bright Blue -Gel filter sheet) (Fig. 4A). Set of 4 chambers were placed on top of the box such that each  
97 chamber is half illuminated with white light from transilluminator and the other half with blue LEDs. The  
98 distance between blue LEDs and the chamber was 5 cm allowing 10 mW/cm<sup>2</sup> of blue light at the chamber  
99 (recorded with Newport optical power meter 1916-C). The behavior recording was performed as above.

100

101 *In vivo labeling and imaging*

102 ---Single neuron labeling

103 The crf::GAL4FF and UAS::tdTomato plasmid constructs were injected at 60 ng/ul (4-6 nl/embryo) into  
104 Tg[HuC::H2B-GCAMP6s] transgenic line at 1-4 cell stage to sparsely label CRF<sup>Hy</sup> neurons. Embryos were  
105 screened at 3-4 dpf under a stereo fluorescence microscope for neuronal expression of tdTomato. At 7 dpf  
106 larvae were imaged under a confocal microscope. The image stack from each larva was registered with Z-  
107 brain Elavl3-H2BRFP template and compared with our reference CRF<sup>Hy</sup> transgenic brain to identify the  
108 position of labelled cell soma and areas of neuronal projections. Anatomical masks from offline Z-brain were  
109 overlapped in imageJ.

110 ---Dye labeling

111 To label the optic tract and spinal projection neurons, 6 dpf larvae were anaesthetized with MS222 and  
112 embedded in the low melting agarose. Lipophilic dye DiD (ThermoFisher-V22887) solution at 2 mg/ml in  
113 ethanol was injected into the eye of 6dpf larva to fill the retinal layer. Alexa-568 conjugated Dextran (10KD,  
114 ThermoFisher -D22912) at 30% in Deneau's solution was injected into the spinal cord just behind the cloaca  
115 from the dorsal side. Larvae were rescued from agarose and allowed to recover and for the dye to spread for  
116 at least 3 hours. Labeled larvae were embedded again in low melting agarose for imaging on a Zeiss LSM  
117 780 confocal microscope. Images were processed with Imaris for tracing neuronal projections.

118 ---In vivo calcium imaging

119 For imaging CRF<sup>Hy</sup> neuronal activity, CRF<sup>Hy</sup>::Gal4FF; UAS::NTR-mCherry fish were crossed with  
120 UAS::GCaMP6s to generate CRF<sup>Hy</sup>::Gal4FF; UAS::GCaMP6s. At 6 dpf larvae were paralyzed in a drop of  
121 neuromuscular-blocking drug mivacurium chloride (1mg/ml) and mounted on the glass bottom holder in 1.5%  
122 low melting point agarose, covered with 1.5 ml E3 medium and placed on temperature-controlled stage at  
123 24°C. The 2P excitation was set at 920 nm, 40 um volume was imaged with 20x objective controlled by piezo  
124 keeping 10-micron step size to cover most of transgenic crf neurons expressing GCaMP6s within the  
125 intermediate hypothalamus. Imaging was carried out at 2 Hz at 780 x 780-pixel resolution (0.887  
126 microns/pixel). Light stimuli was delivered at 200 frames on/off intervals (corresponding to 100 sec based on  
127 2 Hz acquisition) with 455 nm fiber coupled LED (Thorlabs – M455F3) controlled with T-cube Led driver  
128 (Thorlabs-LEDD1B). The optical fiber end was placed above the larva at approximately 5 cm away and at 45-  
129 degree angle with spot lens (uxcell) attached. The light intensity at the imaging stage was 3 mW/cm<sup>2</sup>. Within  
130 the Light-ON duration of 100 sec, LED pulses were delivered at 40Hz to intercalate between the frames to  
131 avoid bleed through into PMT.

132 For simultaneous CRF<sup>Hy</sup> neuronal activity imaging and tail swing recording, non-paralyzed larvae were  
133 mounted on the lid of 35 mm petri dish in 70 ul of 2% low melting agarose. The tail was set free by removing  
134 agarose covering the trunk below the otic vesicles and covered with 3.5 ml E3. Imaging was carried out on 3i  
135 VIVO set up as above with addition of sub-stage camera (FLIR CM3-U3-13Y3M-CS monochrome). Larvae  
136 were illuminated with 800 nm infra-red LEDs (Phenas Home). The 700 nm cut-on and 850 nm cut-off filters  
137 were placed in path to block blue light from stimulating LED and 920 nm imaging laser. The tail movement  
138 was recorded at 100 fps through a sub-stage camera. Light stimuli were delivered at 100 frames on/off  
139 intervals (corresponding to 100 sec based on 1 Hz acquisition)

140 For brain wide calcium imaging, HuC::H2B-GCaMP6s transgenic fish were crossed with CRF<sup>Hy</sup>::GFF;  
141 UAS::NTR-mCherry; UAS::GCaMP6s. Larvae were screened for all transgenes at 3 dpf. For CRF<sup>Hy</sup> ablation,  
142 larvae were treated with MTZ as described above. Neuronal activity imaging and tail swing recording was  
143 carried out on 6-7 dpf larvae as described above. The brain wide imaging was carried out for anterior brain  
144 (covering forebrain- midbrain and part of hindbrain) covering 504 x 484 microns field of view with zeiss 20x  
145 objective. Each volume was 200 microns covered in 11 z-planes with 20 microns step size. The imaging was  
146 carried out at 1 Hz with 390 x380 pixel resolution (1.273 microns/pixel). The tail movement was recorded at  
147 100 fps through sub-stage camera.

## 148 *Data processing*

### 149 *---Image registration*

150 Images z-stack files were saved in the nrrd format. For generating the reference CRF<sup>Hy</sup> transgenic brain, one  
151 of the stacks was used as the template to which image stacks from 9 individual larvae were registered. The  
152 reference CRF<sup>Hy</sup> transgenic brain was generated by averaging the 10 registered stacks. The reference CRF<sup>Hy</sup>  
153 transgenic brain was registered to Elavl3-H2BRFP stack from Z-brain atlas. We used CMTK on local cluster

154 computing (UCSF Wynton) and passed on the parameters -a -w -r 010203 -X 104 -C 8 -G 160 -R 2 -J 0.050  
155 -A '--dofs 6,9 --mi --accuracy 8' -W '--mi --accuracy 8' -v -T 4 -s. The warp coefficient generated by CMTK  
156 were used with CMTK reformat for image stack transformation. The resultant stack was compared with Elavl3-  
157 H2BRFP in ImageJ. Image stacks with anatomical masks were downloaded from offline Zbrain viewer and  
158 merged on to reformatted image stacks in ImageJ.

### 159 *---Neuronal activity data processing*

160 Brain-wide neuronal activity image stacks containing time series from each Z-plane were processed with  
161 CalmAn<sup>13</sup> using the following parameters.

#### 162 # Parameters for source extraction and deconvolution

163 p = 1 # order of the autoregressive system  
164 gnb = 2 # number of global background components  
165 merge\_thr = 1 # merging threshold, max correlation allowed  
166 rf = 5 # half-size of the patches in pixels. e.g., if rf=25, patches are 50x50  
167 stride\_cnmf = 2 # amount of overlap between the patches in pixels  
168 K = 8 # number of components per patch  
169 gSig = [2, 2] # expected half size of neurons in pixels  
170 method\_init = 'greedy\_roi' # initialization method (if analyzing dendritic data using 'sparse\_nmf')  
171 ssub = 1 # spatial subsampling during initialization  
172 tsub = 1 # temporal subsampling during initialization

#### 173 # Parameters for component evaluation

174 min\_SNR = 2 # signal to noise ratio for accepting a component  
175 rval\_thr = 0.9 # space correlation threshold for accepting a component  
176 cnn\_thr = 0.1 # threshold for CNN based classifier  
177 cnn\_lowest = 0.2 # neurons with cnn probability lower than this value are rejected

178 Output files carries the coordinate and dff (GCaMP fluorescence variation) for each extracted ROI. For brain  
179 wide imaging around 24000 regions of interest (ROIs) were extracted from 11 z-panes for each individual  
180 larva. These outputs from CalmAn were processed through custom written script to assign Z-brain anatomical  
181 masks for each ROI. The false positive ROIs detected outside the brain and those corresponding to  
182 anatomical mask 'Ganglia – Eyes' were eliminated for further analysis. Thus, the final output carried  
183 coordinate, dff and anatomical masks for each ROI.

### 184 *---Tail movement behavioral data processing*

185 Tail swing recording videos were processed using a Matlab script<sup>27</sup> to extract tip deflection angle at each  
186 frame. The tail base point was assigned posterior to swim bladder and the tail tip was assigned slightly anterior  
187 to the visible end of the tail. The tail tip angle plot data was exported to excel files for further analysis.

### 188 *Data Analysis*

189 ---Classification of cells (ROIs) based on their photic response properties

190 The cells were classified based on their activity correlation with photic stimuli using custom written script. The  
191 algorithm for classification of a cell based on the light/dark response is as follows. In the first step of  
192 initialization the light time windows  $T_{light}$  and dark time windows  $T_{dark}$  during whole time interval  $T$  were  
193 defined. For a given cell with signal  $\delta$  ( $\Delta F/F$ ),  $\delta_{stimulus,i}^{all}$ ,  $\delta_{stimulus,i}^{qr}$ , and  $\delta_{stimulus,i}^{1th}$  denotes calcium variation  
194 during  $i$ th stimuli window, quarter of the  $i$ th stimuli window and the first time window for a stimuli respectively.  
195 Let  $\delta^{nlargest}$  be the n largest signal value of the signal and  $\delta_{avg}$  the calcium traces average value across time.

196 Next cells are classified in to six classes - light responsive, dark responsive, responsive in transition from dark  
197 to light, responsive in transition from light to dark, active in first light phase, and active in first dark phase as  
198 follows.

199 Define the  $tw_{light}$  and  $tw_{dark}$ , where

$$200 \quad tw_{light}^{all} = \{l: l \in T_{light} \text{ and } \text{averag}(\delta_{light,l}^{nlargest}) > \delta_{avg}\},$$

$$201 \quad tw_{dark}^{all} = \{l: l \in T_{light} \text{ and } \text{averag}(\delta_{dark,l}^{nlargest}) > \delta_{avg}\},$$

202 For a cell  $c$  with calcium traces  $\delta$ :

203 If  $|tw_{light,c}^{all}| > |tw_{dark,c}^{all}|$ , then cell  $c$  is light-responsive cell

204 else, cell  $c$  is dark-responsive cell.

205 If  $\max(\delta_{light,l}^{all}) \in \delta_{light,l}^{qr}$  and  $\text{averag}(\delta_{light,l}^{nlargest}) > \delta_{avg}$ , then cell  $c$  is transition from dark to light.

206 If  $\max(\delta_{dark,l}^{all}) \in \delta_{dark,l}^{qr}$  and  $\text{averag}(\delta_{dark,l}^{nlargest}) > \delta_{avg}$ , then cell  $c$  is transition from light to dark.

207 If  $\delta_{light,1}^{1th} = \text{average}(\delta_{light,1}^{nlargest})$ , then cell  $c$  is active in first light phase.

208 If  $\delta_{dark,1}^{1th} = \text{average}(\delta_{dark,1}^{nlargest})$ , then cell  $c$  is active in first dark phase.

209 Else, cell  $c$  does not classified any of above classes and assigned as unclassified.

210 ---Classification of tail movement events

211 A customized script was used to extract four different kinds of tail swing events: struggle, left turn, right turn,  
212 and swim. In the developed algorithm,  $\Theta$  was denoted to the tail angle at time  $t$  and  $\Theta < 3$  was set as baseline,  
213 whereas  $\Theta > 3$  were used in the event classification process. The event length was determined by sliding  
214 time window  $W1$  and  $W2$ . At first step swim (forward movement) events were identified by setting  $\Theta < 15$  and  
215  $W1 = 50$  (50 frames/500 milliseconds). The turn (flip) event was scored for unidirectional swing by setting  $\Theta >$   
216  $15$  and  $W2 = 200$  (200 frames/1500 milliseconds), and further classified as right turn and left turn based on  
217 positive and negative tail angle values respectively. In the next step the struggle event was defined as  
218 vigorous bidirectional swings with  $\Theta > 15$  and  $W2 = 200$ . The gap window  $\tau = 100$  was set and events within



219 the gap window were merged with hierarchy following swim-to-turn-to-struggle. The identified events were  
220 plotted on tail angle plots and cross checked for accuracy. The events were identified at 99% accuracy by  
221 manual curation with at least 3 subjects.

### 222 --- Relationship of CRF neuronal activity with tail movement events

223 CRF neurons that showed higher than average activity during at least 50% of the tail movement events were  
224 considered to have activity correlation with tail movement. Using this criterion, we found 101/117 CRF cells  
225 (from 7 larvae) showing activity correlated with tail movement. A simple algorithm to identify the peak  
226 (maximum) neuronal activity during the time window (+/-2 sec) around the onset of tail movement event was  
227 developed. The peak activity incidence was scored as concurrent, before or after the onset of tail movement  
228 (Fig. S5G). CRF neurons were classified as being active before, concurrent, or after tail movement if most  
229 peak activity incidences occur before, concurrent, or after the event (Fig. S5G').

### 230 ---Analysis of altered photic tuning properties upon CRF<sup>Hy</sup> neuronal ablation

231 Individual neurons were classified based on their photic tuning properties. The average percentage of cells  
232 corresponding to each photic response class in 147 anatomical mask regions (out of 294 from the Z-brain  
233 atlas) were compared between control and the CRF<sup>Hy</sup> ablated groups (n=10 subjects for each group). The  
234 total number of cells recorded from each anatomical mask were also compared between control and the  
235 CRF<sup>Hy</sup> ablated groups to verify equal data sampling. The anatomical areas showing differential photic  
236 representation ( $p < 0.1$ ) between control and the CRF<sup>Hy</sup> ablated groups were identified. The statistical  
237 significance was further confirmed by non-parametric test and permutation test (10,000 repetitions) using a  
238 custom python script. The anatomical area was excluded if it was scored in less than 5 subjects either in  
239 control or the CRF<sup>Hy</sup> ablated group. Anatomical areas that showed significant difference in total number of  
240 cells recorded were also excluded to avoid unintended bias in the comparison. The overall photic  
241 representation in an anatomical area showing significant differences between control and the CRF<sup>Hy</sup> ablated  
242 groups were subsequently compared using the  $\chi^2$  test ( $p < 0.1$ ).

### 243 ---Analysis of functional Connectivity

244 Functional connectivity comparison between control and CRF<sup>Hy</sup> ablated groups was carried as described in  
245 Fig. 7A. The neuronal activity data (dF/F time series) for each subject from control and CRF<sup>Hy</sup> ablated group  
246 was analyzed for functional connectivity. The cell-to-cell Pearson correlation matrix was derived at correlation  
247 thresholds ranging from 0.1 (low) to 0.8 (high). Since each cell has the anatomical mask identity, mask-to-  
248 mask correlation matrix was prepared. Large anatomical masks such as Telencephalon, Diencephalon were  
249 excluded. Based on our recorded data, 147 masks were analyzed, with correlation thresholds from 0.1 to 0.5.  
250 Increasing the threshold beyond 0.5 resulted in loss of anatomical masks from the analysis. For further  
251 comparison between control and CRF<sup>Hy</sup>-ablated data, correlation matrix with 0.5 (moderate) threshold was  
252 therefore used. Anatomical regions that showed significant differences in total number of cells recorded  
253 between control and CRF<sup>Hy</sup>-ablated groups were excluded. The mask-to-mask pair was excluded if it was

254 scored in less than 5 subjects either in control or CRF<sup>Hy</sup>-ablated group. This resulted in a 135 x 135 mask-to-  
255 mask matrix. The correlation value for each mask pair was calculated (by averaging correlation value of all  
256 cell pairs within that mask pair). Out of 9,045 pairs, only 259 pairs were selected that showed significant  
257 difference in correlation value between control vs CRF<sup>Hy</sup>-ablated groups (Unpaired t test p<0.05 and  
258 permutation test p<0.05). Similar to mask-to-mask correlation value, percent cells pairs with correlation above  
259 0.5 in each mask pair was calculated and only those mask pairs were kept that showed significant difference  
260 between control vs CRF<sup>Hy</sup>-ablated groups (Unpaired t test p<0.05 and permutation test p<0.1). Pairs showing  
261 increased and decreased functional connectivity were identified based on mean difference in correlation value  
262 and percent correlated cell pairs between control vs CRF<sup>Hy</sup>-ablated groups.

263

#### 264 **References cited:**

265

- 266 1. Bergeron SA, Carrier N, Li GH, Ahn S, Burgess HA. Gsx1 expression defines neurons required for  
267 prepulse inhibition. *Mol Psychiatry* 2015; **20**: 974-985.
- 268 2. Niell CM, Meyer MP, Smith SJ. In vivo imaging of synapse formation on a growing dendritic arbor. *Nat*  
269 *Neurosci* 2004; **7**: 254-260.
- 270 3. Vladimirov N, Mu Y, Kawashima T, Bennett DV, Yang C-T, Looger LL *et al.* Light-sheet functional  
271 imaging in fictively behaving zebrafish. *Nat Methods* 2014; **11**(9): 883-884.
- 272 4. Lovett-Barron M, Chen R, Bradbury S, Andalman AS, Wagle M, Guo S *et al.* Multiple convergent  
273 hypothalamus-brainstem circuits drive defensive behavior. *Nat Neurosci* 2020; **23**(8): 959-967.
- 274 5. Wee CL, Nikitchenko M, Wang WC, Luks-Morgan SJ, Song E, Gagnon JA *et al.* Zebrafish oxytocin  
275 neurons drive nocifensive behavior via brainstem premotor targets. *Nat Neurosci* 2019; **22**: 1477-  
276 1492.
- 277 6. Förster D, Kramer A, Baier H, Kubo F. Optogenetic precision toolkit to reveal form, function and  
278 connectivity of single neurons. *Methods* 2018; **150**: 42-48.
- 279 7. Fujimoto E, Stevenson TJ, Chien CB, Bonkowsky JL. Identification of a dopaminergic enhancer  
280 indicates complexity in vertebrate dopamine neuron phenotype specification. *Dev Biol* 2011; **352**: 393-  
281 404.
- 282 8. Kimura Y, Satou C, Fujioka S, Shoji W, Umeda K, Ishizuka T *et al.* Hindbrain V2a neurons in the  
283 excitation of spinal locomotor circuits during zebrafish swimming. *Curr Biol* 2013; **23**: 843-849.
- 284 9. Dal Maschio M, Donovan JC, Helmbrecht TO, Baier H. Linking Neurons to Network Function and  
285 Behavior by Two-Photon Holographic Optogenetics and Volumetric Imaging. *Neuron* 2017; **94**: 774-  
286 789.
- 287 10. Davison JM, Akitake CM, Goll MG, Rhee JM, Gosse N, Baier H *et al.* Transactivation from Gal4-VP16  
288 transgenic insertions for tissue-specific cell labeling and ablation in zebrafish. *Dev Biol* 2007; **304**:  
289 811-824.
- 290 11. Schindelin J, Arganda-Carreras I, Frise E, Kaynig V, Longair M, Pietzsch T *et al.* Fiji: an open-source  
291 platform for biological-image analysis. *Nat Methods* 2012; **9**: 676-682.
- 292 12. Rohlfing T, Maurer CR. Nonrigid image registration in shared-memory multiprocessor environments  
293 with application to brains, breasts, and bees. *IEEE Trans Inform Technol Biomed* 2003; **7**: 16-25.
- 294
- 295
- 296
- 297
- 298
- 299
- 300
- 301
- 302
- 303
- 304

305  
306 13. Giovannucci A, Friedrich J, Gunn P, Kalfon J, Brown BL, Koay SA *et al.* CalmAn an open source tool  
307 for scalable calcium imaging data analysis. *Elife* 2019; **8**: e38173.  
308  
309 14. van der Walt S, Colbert SC, Varoquaux G. The NumPy Array: A Structure for Efficient Numerical  
310 Computation. *Computing in Science & Engineering* 2011; **13**: 22-30.  
311  
312 15. Oliphant TE. Python for Scientific Computing. *Computing in Science & Engineering* 2007; **9**: 10-20.  
313  
314 16. van der Walt S, Schonberger JL, Nunez-Iglesias J, Boulogne F, Warner JD, Yager N *et al.* Scikit-  
315 image: image processing in Python. *Peer J* 2014; **2**: e453.  
316  
317 17. Pedregosa F, Varoquaux G, Gramfort A, Michel V, Thirion B, Grisel O *et al.* Scikit-learn: Machine  
318 Learning in Python. *JMLR* 2011; **12**(85): 2825-2830.  
319  
320 18. Seabold S, Perktold J. statsmodels: Econometric and statistical modeling with python. *Proceedings of*  
321 *the 9th Python in Science Conference* 2010: 92-96.  
322  
323 19. Hunter JD. Matplotlib: A 2D Graphics Environment. *Computing in Science & Engineering* 2007; **9**: 90-  
324 95.  
325  
326 20. Kluyver T, Ragan-Kelley B, Pérez F, Granger B, Bussonnier M, Frederic J *et al.* Jupyter Notebooks –  
327 a publishing format for reproducible computational workflows. In: Loizides F, Schmidt B (eds).  
328 *Positioning and Power in Academic Publishing: Players, Agents and Agendas*. IOS Press 2016, pp 87-  
329 90.  
330  
331 21. McKinney W, *al e.* Data structures for statistical computing in python. *Proceedings of the 9th Python*  
332 *in Science Conference* 2010; **445**: 51-56.  
333  
334 22. Kent WJ, Sugnet CW, Furey TS, Roskin KM, Pringle TH, Zahler AM *et al.* The Human Genome  
335 Browser at UCSC. *Genome Res* 2002; **12**: 996-1006.  
336  
337 23. Balciunas D, Wangenstein KJ, Wilber A, Bell J, Geurts A, Sivasubbu S *et al.* Harnessing a high cargo-  
338 capacity transposon for genetic applications in vertebrates. *PLoS Genet* 2006; **2**: e169.  
339  
340 24. Liu NA, Huang H, Yang Z, Herzog W, Hammerschmidt M, Lin S *et al.* Pituitary corticotroph ontogeny  
341 and regulation in transgenic zebrafish. *Mol Endocrinol* 2003; **17**: 959-966.  
342  
343 25. Bai Y, Liu H, Huang B, Wagle M, Guo S. Identification of environmental stressors and validation of  
344 light preference as a measure of anxiety in larval zebrafish. *BMC Neurosci* 2016; **17**: 63.  
345  
346 26. Wagle M, Mathur P, Guo S. Corticotropin-releasing factor critical for zebrafish camouflage behavior is  
347 regulated by light and sensitive to ethanol. *J Neurosci* 2011; **31**: 214-224.  
348  
349 27. Severi KE, Böhm UL, Wyart C. Investigation of hindbrain activity during active locomotion reveals  
350 inhibitory neurons involved in sensorimotor processing. . *Sci Rep* 2018; **8**: 13615.  
351  
352

## Supplementary Figures and Tables

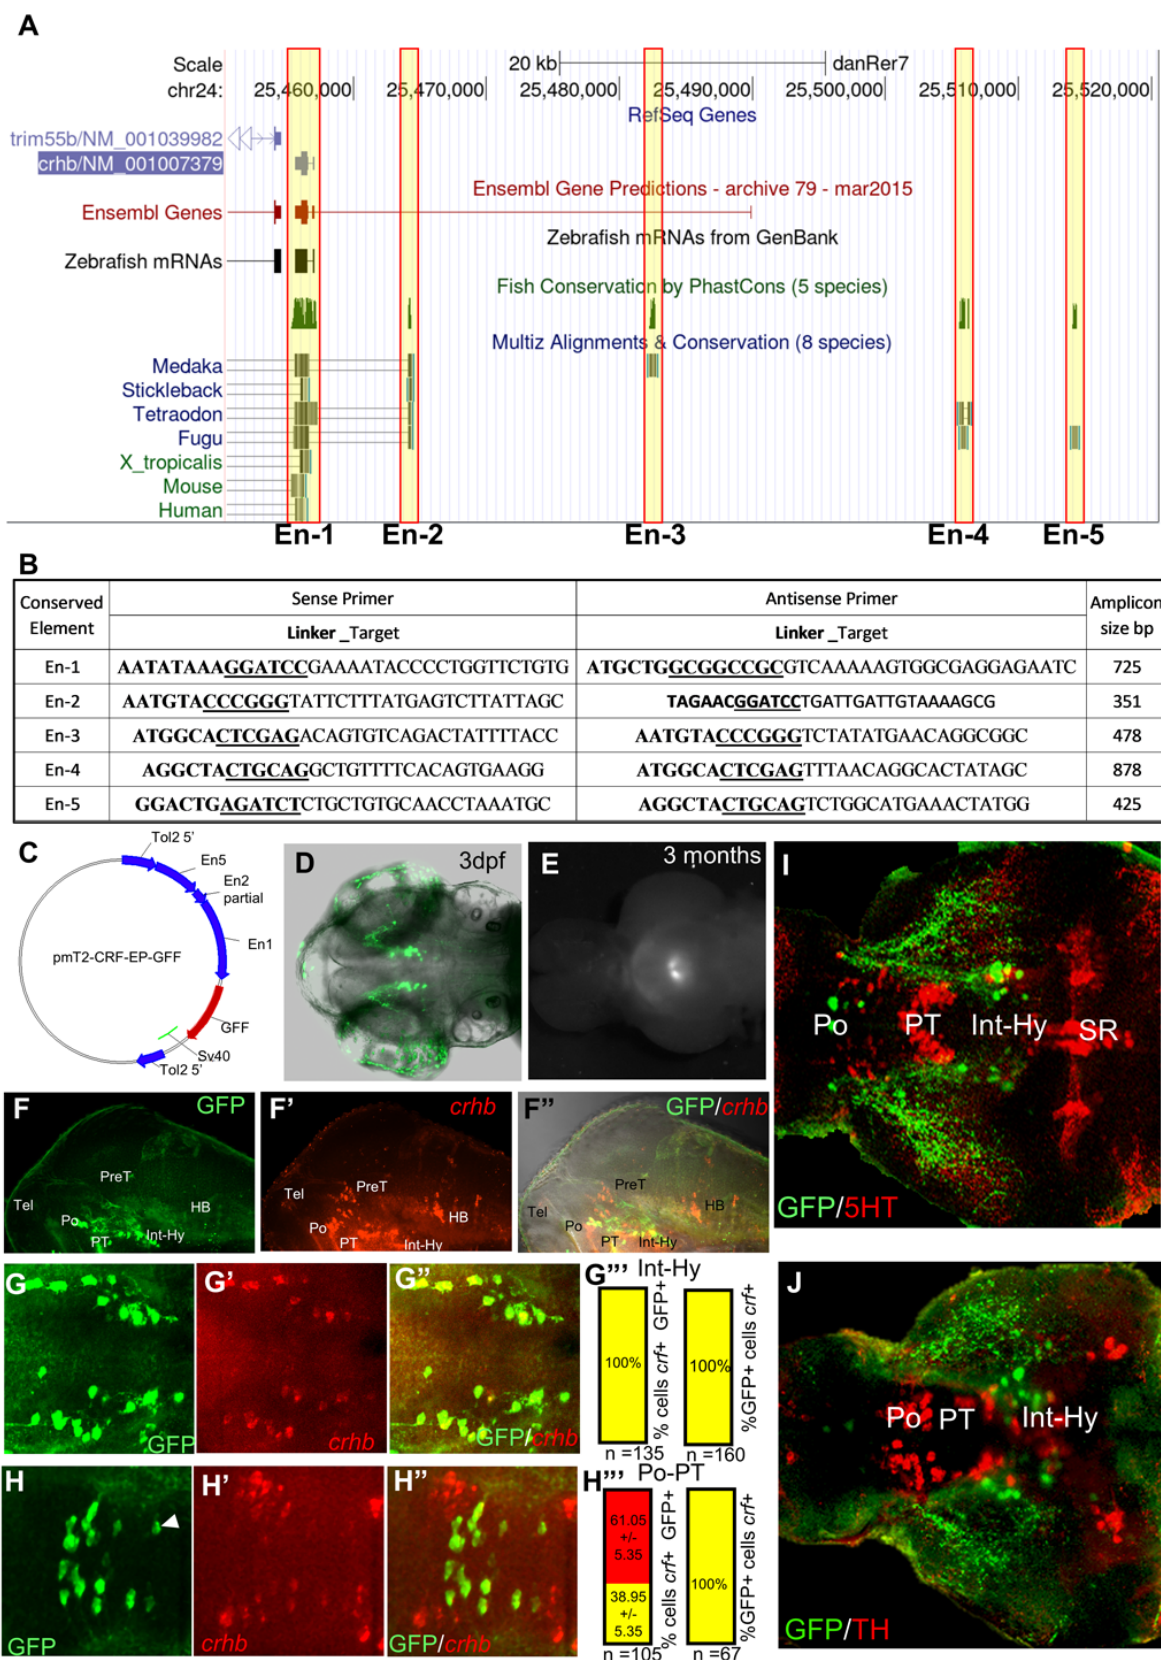

354

355

356

**Fig. S1. An enhancer-based approach to gain specific genetic access to CRF<sup>Hy</sup> neurons in zebrafish.** (A) Image of the zebrafish *crhb* gene locus from the UCSC Genome browser, showing the position

357 of vertebrate conserved non-coding regions (yellow highlighted vertical boxes). **(B)** Table showing the primers  
358 used for amplifying conserved non-coding regions. **(C)** Schematic of the transgenic constructs. **(D)** GFP  
359 transgene expression in 3dpf larva. **(E)** GFP transgene expression in 3 months old adult brain –ventral view.  
360 **(F)** Lateral view Images of CRF<sup>Hy</sup> neurons labeled with GFP (F) and *crhb* fluorescent in-situ hybridization (F')  
361 and overlap with brightfield image (F''). **(G-H)** High magnification images prepared by maximum intensity  
362 projection of selected confocal z-planes showing dorsal view of CRF<sup>Hy</sup> neurons in the intermediate  
363 hypothalamus (Int-Hy)(G-G'') and pre-optic and posterior tuberculum (Po-PT) area (H-H'') labeled with GFP  
364 (G&H), *crhb* fluorescent in-situ hybridization (G'&H'), and merged view (G''&H''). Quantification bar graphs  
365 (G'''&H''') indicate endogenous *crhb* only-expressing cells (red) and cells expressing both endogenous *crhb*  
366 and transgene GFP (yellow). **(I-J)** Maximum intensity projection images of selected confocal z-planes  
367 showing dorsal view of 6dpf larval brain stained with anti-5HT (I) or anti-TH (J) (red stained cells) and anti-  
368 GFP antibody (green stained cells) showing relative location to serotonergic (I) and dopaminergic neurons (J)  
369 with respect to CRF<sup>Hy</sup> neurons.

### A *crhb* gene structure and sgRNA target

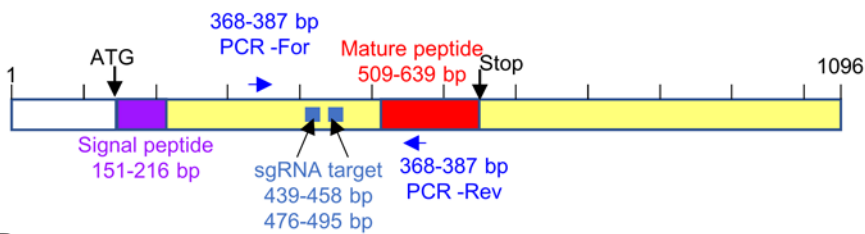

### B

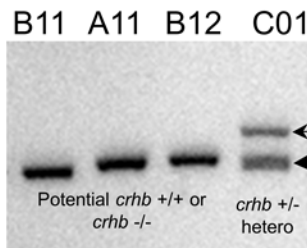

1st PCR using genomic DNA from larva as template

### C

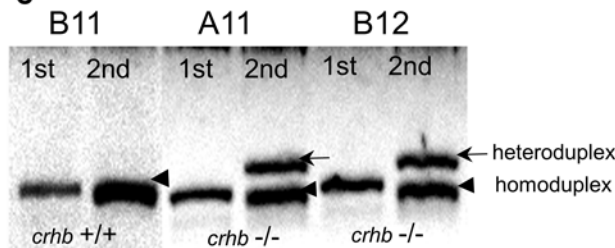

Comparison of 1st PCR and 2nd PCR using 1st PCR product + WT genomic DNA as template

### D

```

      E G K V G N I G R                               L D G S Y A L
crhb aggggaaagtggaaacatcggccgc-----ttggaaggcagttacgcgctc
WT    AGGGGAAAGTTGGAAACATCGGCCGC-----TTGTATGGCAGTTACGCGCTC
B11   AGGGGAAAGTTGGAAACATCGGCCGC-----TTGTATGGCAGTTACGCGCTC
A11   AGGGGAAAGTTGGAAACATCGGCCGCAGTTACATCGGATGGCAGTTACGCGCTC
B12   AGGGGAAAGTTGGAAACATCGGCCGCAGTTACATCGGATGGCAGTTACGCGCTC
      S Y I G W Q L R A

```

### E

```

crhb_wildtype MKLNFLVTTVALLVAFPPPYECRAIESSFNQPAADPDGERQSPVVLARLGE EYFIRLGNR
crhb_mutant  MKLNFLVTTVALLVAFPPPYECRAIESSFNQPAADPDGERQSPVVLARLGE EYFIRLGNR

crhb_wildtype NPTSPRSPADSF PETSQYPKRALQLQLTQRLLLEGKVGNI GR--LDGSYALRA----LDSM
crhb_mutant  NPTSPRSPADSF PETSQYPKRALQLQLTQRLLLEGKVGNI GRsyI-G-WQLRAPGARLNG-

crhb_wildtype ERER--RSEE-PPISLDL---TFHLLR-----EVLEMARAE--QMAQQAHSNRKMMEIFGK
crhb_mutant  EGAQVGGAAADFPR-S-DLSSAT----RSTGDGQ----SRANGPASSQQPQNDGNIREV---

```

370

371

372

373

374

375

376

377

378

379

380

**Fig. S2. Generation of the *crhb* mutant using CRISPR genome editing.** (A) Schematic showing the *crhb* gene structure with the location of sgRNA target sites and genotyping primers indicated. (B) PCR amplification with primers flanking the mutation sites clearly identifies heterozygous (C01, with double bands). However, both wildtype and homozygous mutants have single bands, with minor mobility differences that are difficult to distinguish. (C) The 1<sup>st</sup> round PCR product from genotypically unknown individuals (B11, A11, B12) were mixed with PCR products from known wildtype and subjected to a single round of denaturation and annealing, and amplified again with primers flanking the mutation sites (2<sup>nd</sup> round PCR). The gel reveals the difference between wildtype and homozygous mutants: B11 wildtype with single homoduplex band, versus A11 and B12 homozygous mutants showing double bands after the 2<sup>nd</sup> round of PCR. (D) Sequencing of the PCR product shows 7 bp insertion in the mutant, compared to the reference *crhb* sequence; the red letters show the guide

381 RNA target site. **(E)** Amino acid sequence comparison of wildtype and mutant *crhb*, with the sequences  
382 upstream of insertion site (marked with red letters) highlighted in yellow. The signal peptide is shown in green  
383 letters, sequence downstream of insertion site shows frame shift abolishing the production of mature CRF  
384 peptide (in blue bold letters).

385

**A CMTK – registration of image stacks and assignment of ROI coordinates for Ca<sup>2+</sup> imaging data**

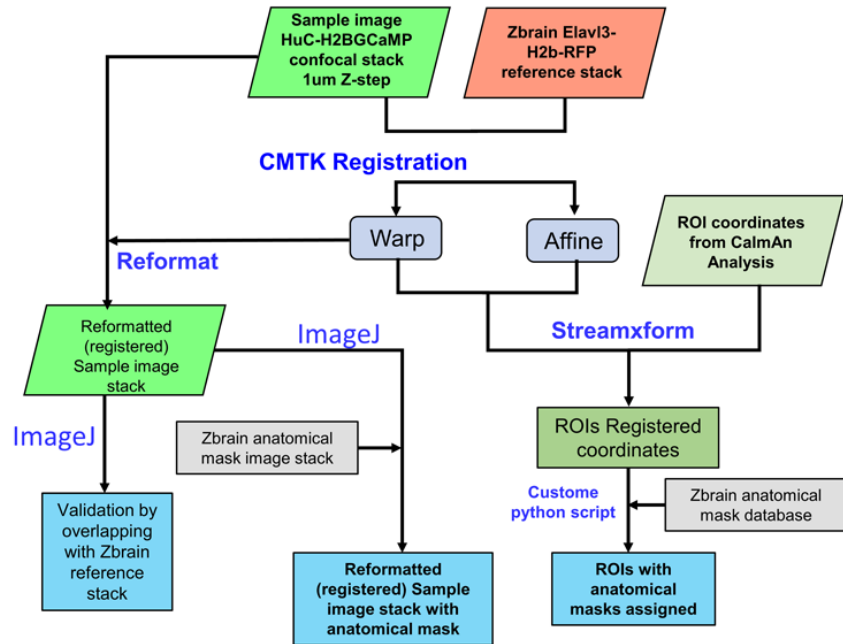

**B Overlap of registered Tg[Huc-H2B-GCaMP] with Z-brain Elvl13-H2BRFP**

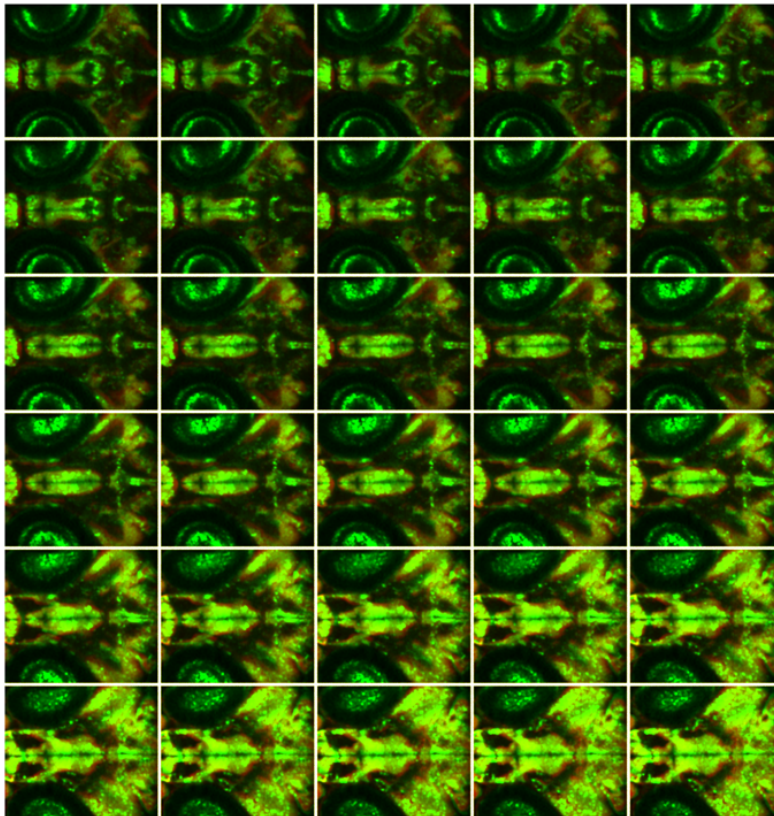

386

387 **Fig. S3. Image registration with the Z-brain atlas.** (A) A flow chart showing registration of image stacks  
 388 using the CMTK-reformat function to identify anatomical areas based on the Z-brain atlas anatomical masks.  
 389 The CMTK-streamxform is used for registering coordinates of ROIs from CalmAn analysis and custom script



390 is designed to assign Z-brain anatomical masks. **(B)** Montage of z-slices from composite image stacks created  
391 by overlapping Elval3-H2B-RFP image stacks from Z-brain (red) and HuC::H2b-GCaMP stacks (green) after  
392 CMTK registration. Excellent alignments are obtained.  
393

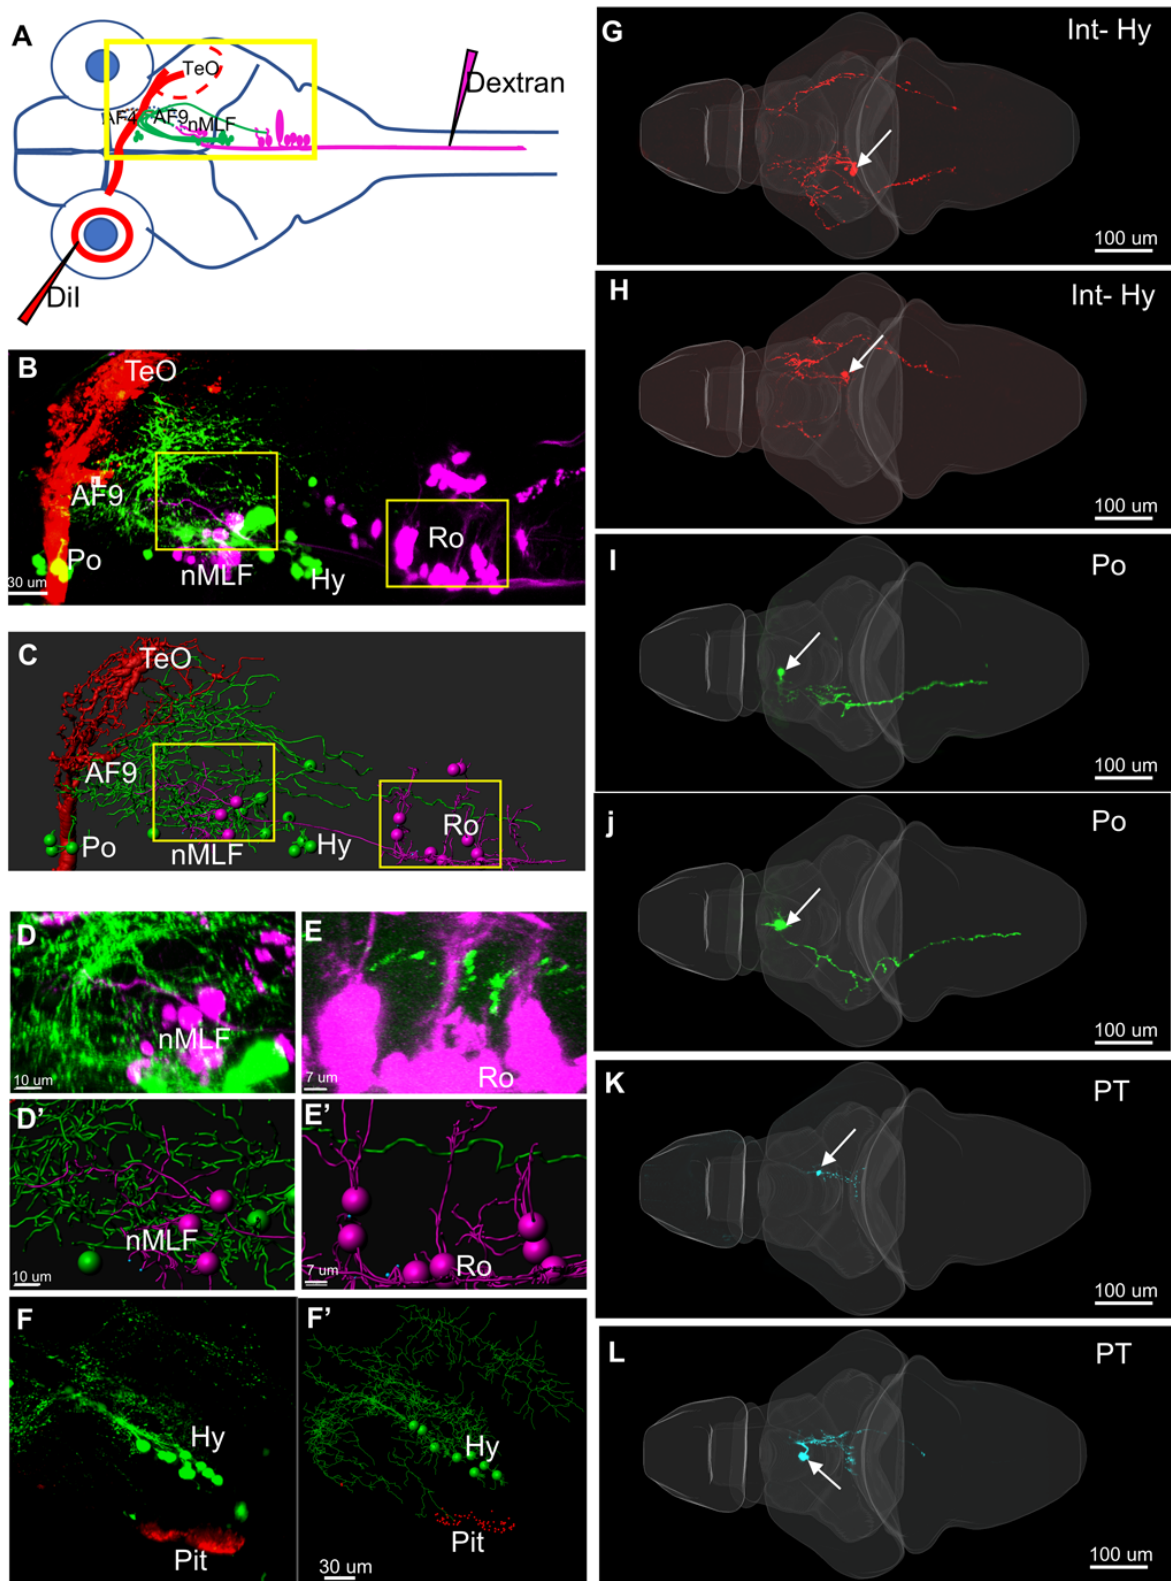

394

395

396

397

**Fig. S4. Tracing single  $CRF^{Hy}$  neuronal projections.** (A) Schematic showing the procedure of Dil labeling of retinal ganglion cells (RGCs) in the eye and back-filling spinal cord in transgenic animals. (B) Image of retinal Dil (red), CRF-GFP (green), along with nMLF and reticulospinal neurons (magenta) backfilled with

398 Alexa-Dextran in the spinal cord. **(C)** Imaris rendering of the image in (b). **(D-D', E-E')** zoomed-in image and  
399 Imaris rendering showing CRF-GFP labeled processes in proximity to nMLF (D,D') and reticulospinal neurons  
400 (e,e'). **(F-F')** Maximum intensity projection of confocal stacks and Imaris rendering of immunostaining of  
401 CRF<sup>Hy</sup> transgenic larvae with anti-GFP antibody (green) and anti-ACTH (red), showing CRF<sup>Hy</sup> neuronal  
402 processes in close proximity to pituitary cells labelled with anti-ACTH antibody. **(G-L)** Examples of single CRF  
403 neuron labeling, arrow pointing to the cell soma. CRF neurons in Int-Hy (G,H), Pre-optic area (I,J) and  
404 Posterior Tuberculum (K,L).  
405

### A Head fixed tail free zebrafish larva

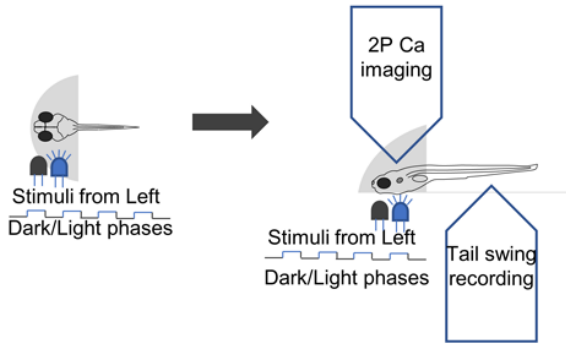

### B Tail movement classification

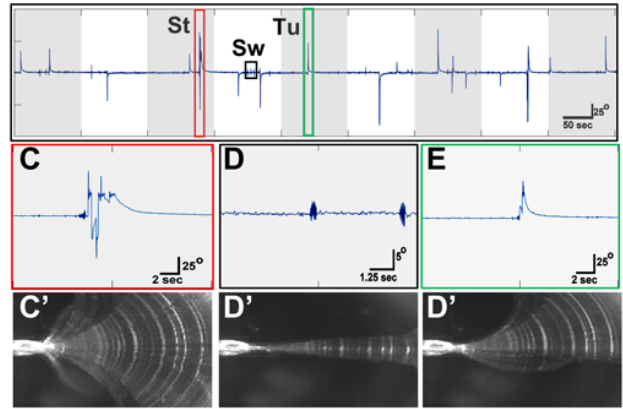

### F CRF neuron activity correlation with tail movement (example fish, n=14 neurons)

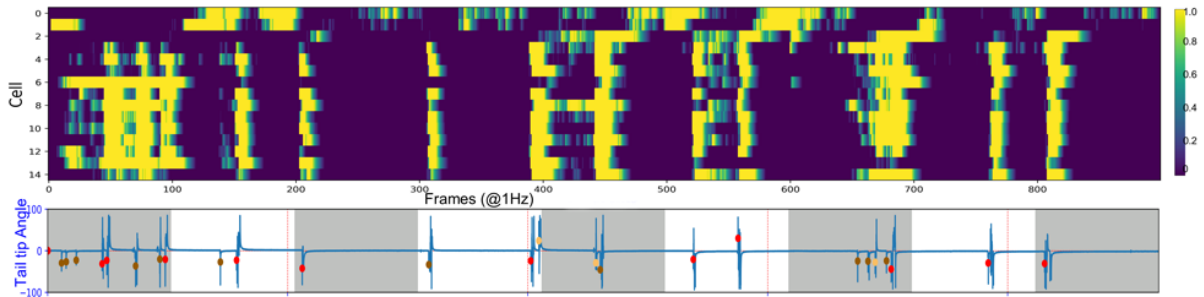

### G

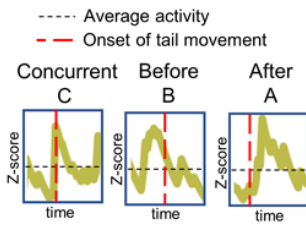

### G'

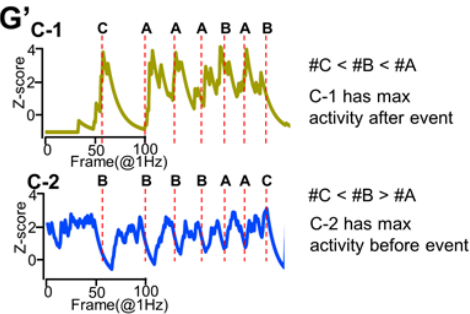

### G''

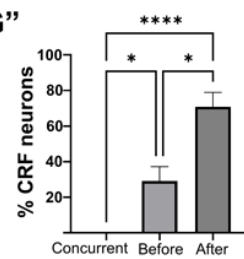

### H

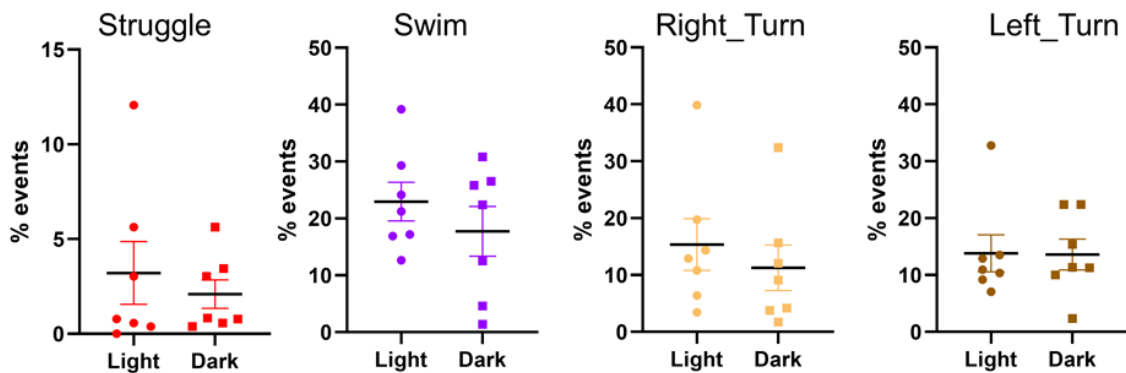

406

407

408

409

**Fig. S5. CRF<sup>Hy</sup> neurons in head-restrained/tail-free non-paralyzed larval zebrafish are strongly activated during vigorous motion.** (A) Schematic showing calcium imaging in non-paralyzed and tail-free larva. The blue LED (455 nm) light was pulsed to deliver photic stimuli in alternate light and dark phases. Sub-

410 stage objective lens and camera was used to record tail movements. **(B)** Example tail tip deflection angle (y-  
411 axis) plot, showing three types of events St-Struggle, Sw-Swim, Tu-Turn (x-axis: time). **(C-E)** Enlarged view  
412 of plot insets in B; **(C'-E')** maximum intensity projection of selected video frames during Struggle, Swim, and  
413 Turn events. **(F)** An example Z-score heatmap plot of CRF<sup>Hy</sup> neuronal activity imaged in non-paralyzed, tail  
414 free larva showing correlation with tail movement events shown in the tail tip angle plot below. **(G-G')**  
415 Correlation of CRF neuronal activity with tail movement. Schematic showing peak neuronal activity in relation  
416 to the onset of tail movements (G). Schematic showing individual neuron classification based on the numbers  
417 of concurrent, before and after events (G'). Neuron c-1 is classified as "after" since most events show CRF  
418 neuronal activity after tail movements, whereas c-2 is classified as "before". Concurrent activity events were  
419 found to be rare hence none of the CRF neurons were classified as "concurrent". Plot on right shows percent  
420 of CRF neurons with activity in relation to the tail movements (G"), Kruskal-Wallis test, Dunn's multiple  
421 comparisons test, n= 101 neurons, \* p<0.05, \*\*\*\* p<0.0001, error bars representing SEM. **(H)** Scatter plots  
422 showing average number of struggles, swim, right or left turns in light and dark phases, n=7 larvae, error bars  
423 representing SEM. No significant difference was observed for any of four events.

424

### A Neuronal activity and tail movement data processing pipeline

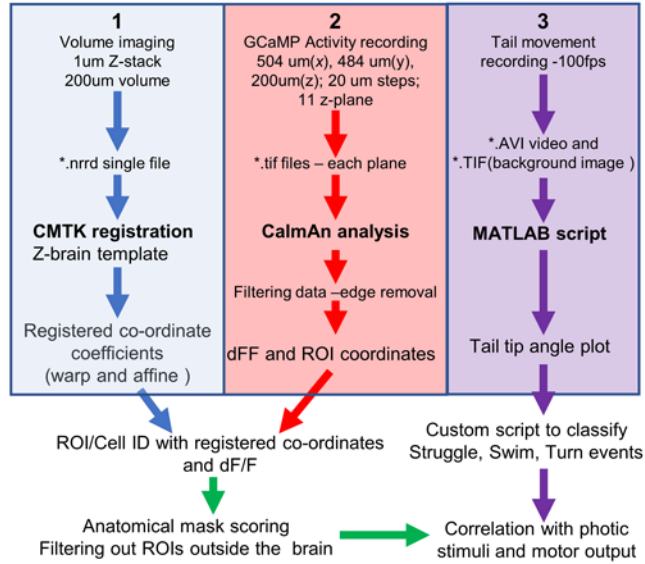

### B Cell active in Light or Dark phase

n-largest = top 10% z-score values in a given phase

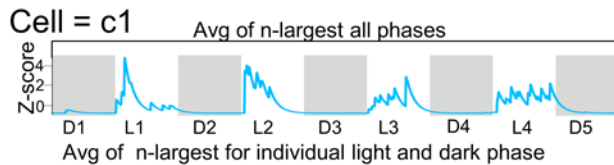

If Avg of n-largest D or L > Avg of n-largest all phases

then  (  )

else  (  )

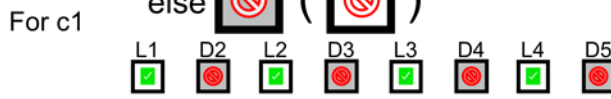

#  > #

c1 has max activity in Light

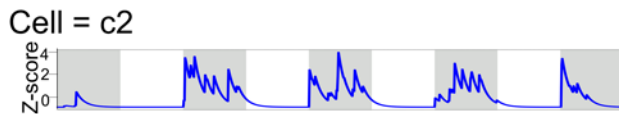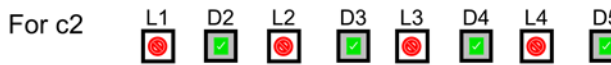

#  < #

c2 has max activity in Dark

### C Cell active in First Light or First Dark phase

n-largest = top 10% z-score values

Cell = c3

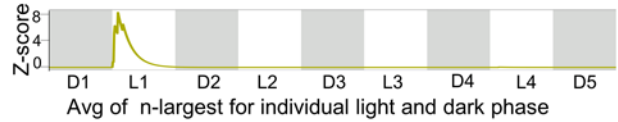

If Max [of n-largest in all phase] = Avg of n-largest in L1  
then c3 has max activity in first Light phase

Cell = c4

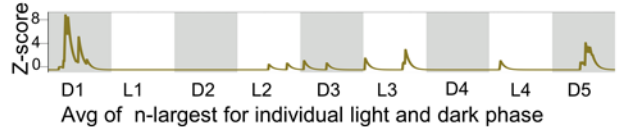

If Max [of n-largest in all phase] = Avg of n-largest in D1  
then c4 has max activity in first Dark phase

### D Cell active in Transition from Dark to Light or Transition from Light to Dark

Cell = c5

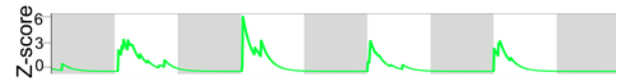

If phase: max Z-score = 1<sup>st</sup> sub-phase: max Z-score

then  (  )

else  (  )

1<sup>st</sup> Sub-phase: max Z-score

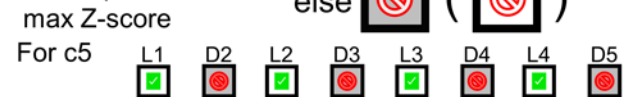

#  = # L-phases

c5 has max activity in Dark to Light transition

Cell = c6

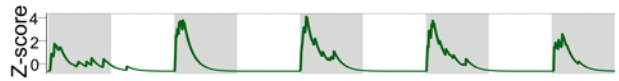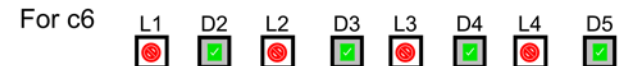

#  = # D-phases

c6 has max activity in Light to Dark transition

425

426

427

428

**Fig. S6. Brain-wide data processing pipeline and the algorithm for classifying photic response neuronal types.** (A) Flow chart showing three-way data processing for each larva. The HuC-H2B-CaMP6s image stacks with 1µm z-step was registered with the Z-brain Elv13-H2B-RFP template through CMTK

429 registration (1). The calcium imaging data were analyzed using the CalmAn software (2) and tail movement  
430 recording was processed using Matlab and custom python scripts (3). **(B-D)** Classification of neurons based  
431 on their photic responses. Maximum activity of neurons with respect to light and dark phases was scored. **(B)**  
432 The n-largest are the top 10% z-score values of each neuronal activity plot in a given phase. The example  
433 activity plot (z-score) with light and dark phase is shown at the top. The average n-largest of each light phase  
434 (L1-L3) and dark phase (D2-D4) were compared with average n-largest of entire data (in all phases). The  
435 example cell c1 is classified to “active in light” class, as the number of light phases showing avg-n-largest  
436 higher than avg-n-larges-all are more than the number of dark phases with avg-n-largest higher than avg-n-  
437 larges-all. The example cell c2 is classified to “active in dark” class, as number of dark phases showing avg-  
438 n-largest higher than avg-n-larges-all are more than light phases with avg-n-largest higher than avg-n-larges-  
439 all. **(C)** Neurons were classified in “First Light” (example cell c3) or “First Dark” (example cell c4) by comparing  
440 maximum values of n-largest-all with avg-n-largest in first light (L1) or first dark (D1) phase. **(D)** Each light  
441 and dark phase is divided into 5 sub-phases, if the maximum z-score value of the phase happens to be in the  
442 first sub-phase then that phase is considered as active during transition. The neuron is classified to “Transition  
443 from Dark to Light” class if number of light phases are more than number dark phases active during transition  
444 as shown in example cell c5. The example cell c6 is classified to “Transition from Light to Dark” class as  
445 number of dark phases active during transition are more than light phases.

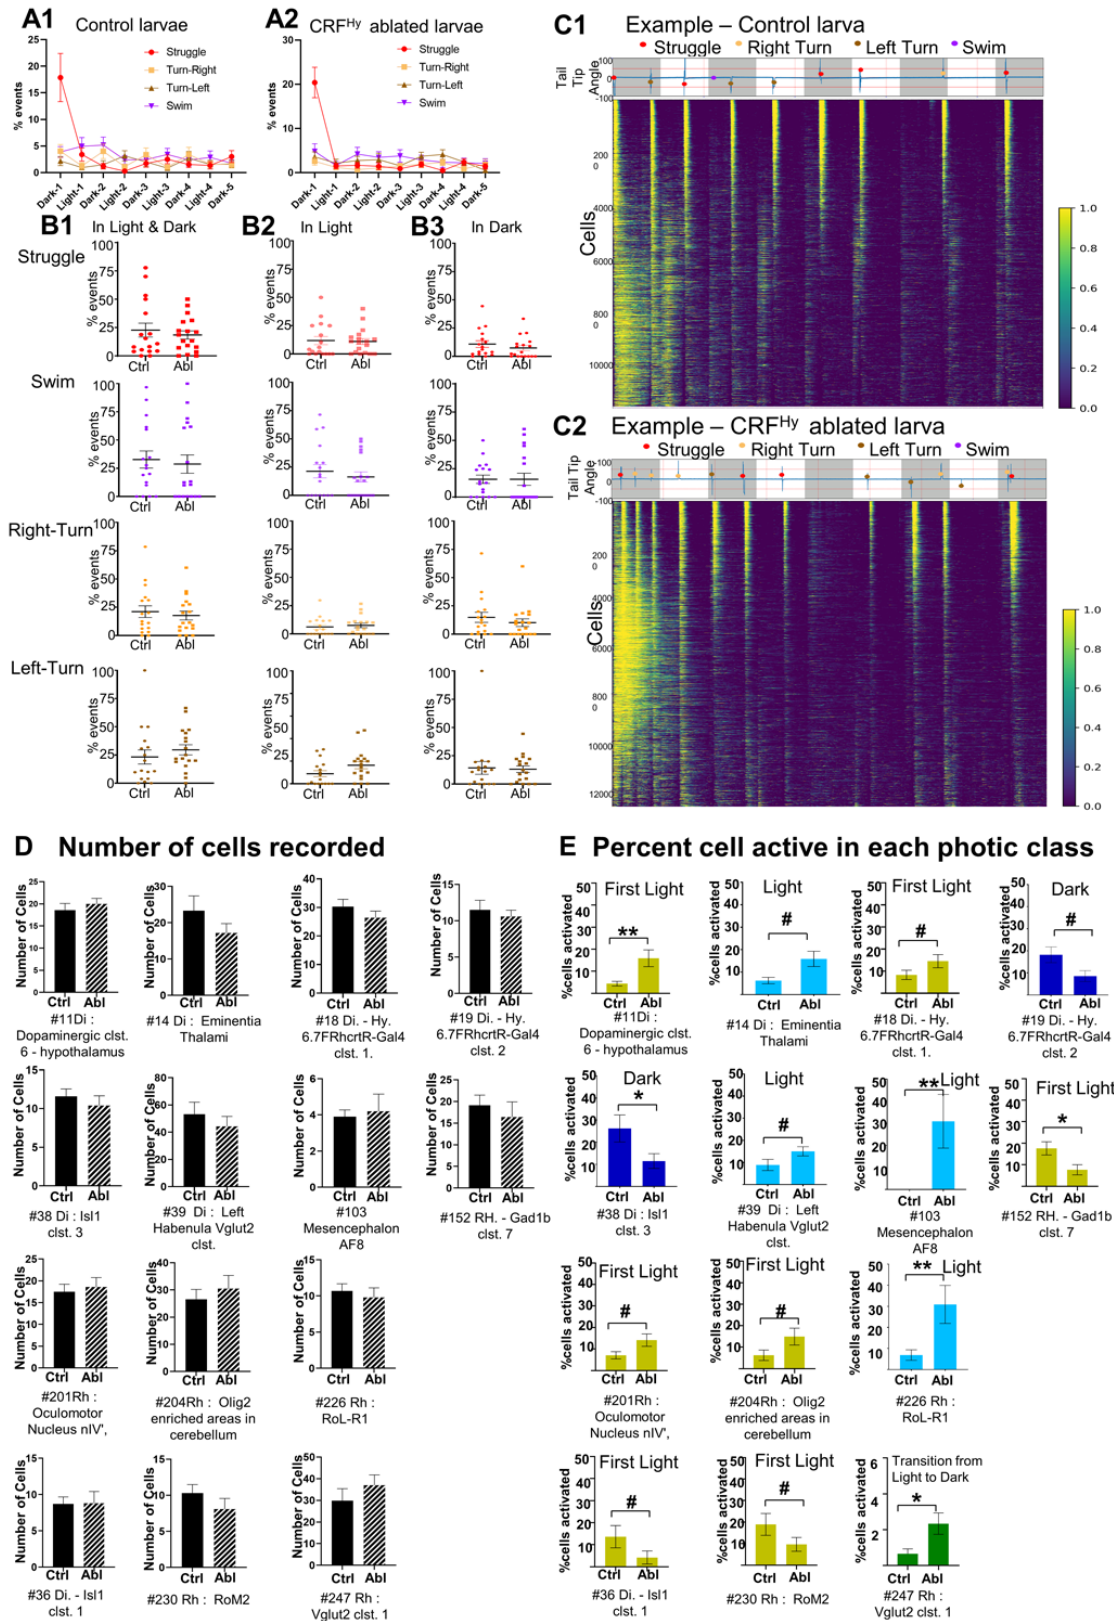

446

447

448

449

**Fig. S7. Comparison of tail movement events and brain-wide neuronal activity between control and CRF<sup>Hy</sup>-ablated subjects. (A1, A2) Tail tip turn events in all light and dark phases for control (A1) and CRF<sup>Hy</sup>-ablated subjects (A2). (B1-B3) Comparison of struggle, swim, right turn and left turn events between control**



450 and CRF<sup>Hy</sup>-ablated subjects during all phases except the first dark phase (B1), all light phases (B2), and all  
451 but first dark phases (B3). No significant differences were observed. Mann Whitney test, n=17 control, 18  
452 CRF<sup>Hy</sup>-ablated, error bars representing SEM. **(C1,C2)** Example of brain wide activity heatmaps arranged in  
453 order of correlation with tail moment for control (C1) and CRF<sup>Hy</sup>-ablated larva (C2). The top shows the tail  
454 movement plot with tail tip angle and light/dark phases marked. Color dots indicate the type of tail  
455 moment events. **(D)** comparison of total number of cells recorded between control and CRF<sup>Hy</sup>-ablated  
456 subjects for anatomical regions from Fig. 6B, E. No significant differences were observed. n=10 larvae per  
457 group, non-parametric two tailed Mann Whitney test **(E)** Comparison cells activated in a photic class between  
458 control and CRF<sup>Hy</sup>-ablated subjects. The color of the bar graph is as per photic class indicated in Fig.  
459 6B. n=10 larvae per group, non-parametric two tailed Mann Whitney test, # p<0.1, \*p<0.05, \*\* p<0.01, error  
460 bars representing SEM.

461  
462

**Table S1. Increased functional connectivity in CRF<sup>Hy</sup> -ablated subjects**

| Mask-A                       |                   |                 | Mask-B                                      |                   |                 | Correlation value (R) |                       |                 |                       | % cell pairs with R above threshold (0.5) |                                   |                 |                       |
|------------------------------|-------------------|-----------------|---------------------------------------------|-------------------|-----------------|-----------------------|-----------------------|-----------------|-----------------------|-------------------------------------------|-----------------------------------|-----------------|-----------------------|
| Name                         | Neuro-transmitter | Z-brain Mask ID | Name                                        | Neuro-transmitter | Z-brain Mask ID | Ctrl                  | CRF <sup>Hy</sup> Abl | Unpaired t-test | permutation one sided | Ctrl-% cell pair                          | CRF <sup>Hy</sup> Abl-% cell pair | Unpaired t test | permutation one sided |
| Mes. - Ptf1a clst.           | GABA              | 101             | Di. - Ant. pretectum clst. of vmat2 Neurons | Glut              | 4               | 0.603                 | 0.621                 | *               | *                     | 9.606                                     | 14.714                            | *               | *                     |
| Mes. - Ptf1a clst.           | GABA              | 101             | Di. - Dopaminergic clst. 3 - hypothalamus   | -                 | 9               | 0.578                 | 0.622                 | *               | **                    | 6.351                                     | 10.610                            | *               | **                    |
| Mes. - Ptf1a clst            | GABA              | 101             | Rh. - Cerebellar-VGlut2 enriched areas      | -                 | 130             | 0.614                 | 0.630                 | *               | *                     | 7.653                                     | 10.410                            | *               | **                    |
| Mes. - Ptf1a clst.           | GABA              | 101             | Rh. - Cerebellum                            | -                 | 131             | 0.601                 | 0.618                 | **              | *                     | 5.292                                     | 8.749                             | **              | **                    |
| Mes. - Ptf1a clst.           | GABA              | 101             | Rh. - Eminentia Granularis                  | GABA              | 134             | 0.600                 | 0.625                 | *               | *                     | 6.215                                     | 10.384                            | *               | **                    |
| Mes. - Ptf1a clst.           | GABA              | 101             | Rh. - Gad1b clst. 2                         | GABA              | 146             | 0.606                 | 0.629                 | **              | **                    | 8.634                                     | 14.933                            | **              | **                    |
| Mes. - Ptf1a clst.           | GABA              | 101             | Di. - Hy. VGlut2 clst. 5                    | Glut              | 31              | 0.588                 | 0.619                 | *               | *                     | 6.727                                     | 13.027                            | *               | *                     |
| Rh. - Otpb clst 2 - LC       | NA -              | 206             | Di. - Hb.                                   | Glut              | 15              | 0.581                 | 0.608                 | *               | *                     | 2.003                                     | 4.621                             | *               | *                     |
| Rh. - Otpb clst 2 -LC        | -                 | 206             | Di. - Right Hb. VGlut2 clst.                | Glut              | 73              | 0.579                 | 0.616                 | *               | *                     | 2.189                                     | 6.467                             | *               | *                     |
| Rh. - Otpb clst2 -LC         | -                 | 206             | Rh. - Otpb clst. 1                          | -                 | 205             | 0.607                 | 0.681                 | **              | *                     | 11.045                                    | 32.439                            | **              | #                     |
| Di. - Right Hb. VGlut2 clst. | Glut              | 73              | Rh. - RoL-R1                                | -                 | 226             | 0.580                 | 0.627                 | *               | *                     | 2.326                                     | 6.470                             | *               | *                     |
| Rh. - Otpb clst. 1           | -                 | 205             | Di. - Hy. - Ca. Hy. Neural clst.            | -                 | 16              | 0.576                 | 0.615                 | *               | *                     | 2.844                                     | 7.756                             | *               | #                     |
| Di. - Hy. Qrfp neuron clst   | Glut              | 26              | Rh. - Gad1b clst. 16                        | GABA              | 142             | 0.572                 | 0.591                 | *               | *                     | 2.221                                     | 5.549                             | *               | *                     |
| Rh. - Gad1b clst. 1          | GABA              | 135             | Rh. - Gad1b clst. 7                         | GABA              | 152             | 0.575                 | 0.600                 | **              | *                     | 2.616                                     | 6.249                             | **              | *                     |

# p<0.1, \* p<0.05, \*\*p<0.01

463  
464

465  
466**Table S2. Decreased functional connectivity in CRF<sup>Hy</sup> -ablated subjects**

| Mask-A                                      |                   |                 | Mask-B                                         |                   | Correlation value (R) |       |                       |                 |                       | % cell pairs with R above threshold (0.5) |                                   |                 |                       |
|---------------------------------------------|-------------------|-----------------|------------------------------------------------|-------------------|-----------------------|-------|-----------------------|-----------------|-----------------------|-------------------------------------------|-----------------------------------|-----------------|-----------------------|
| Name                                        | Neuro-transmitter | Z-brain Mask ID | Name                                           | Neuro-transmitter | Z-brain Mask ID       | Ctrl  | CRF <sup>Hy</sup> Abl | Unpaired t-test | permutation one sided | Ctrl-% cell pair                          | CRF <sup>Hy</sup> Abl-% cell pair | Unpaired t test | permutation one sided |
| Mes. - Vmat2 clst. of paraventricular organ | -                 | 112             | Di. - Otpb clst. 4                             | -                 | 49                    | 0.626 | 0.594                 | *               | *                     | 7.866                                     | 4.217                             | *               | *                     |
| Mes. - Vmat2 clst. of paraventricular organ | -                 | 112             | Mes. - Retinal Arborization Field 9 (AF9)      | -                 | 104                   | 0.644 | 0.575                 | *               | **                    | 5.610                                     | 2.603                             | *               | *                     |
| Mes. - Vmat2 clst. of paraventricular organ | -                 | 112             | Rh. - Ant. clst. of nV Trigeminal Motorneurons | -                 | 124                   | 0.621 | 0.594                 | *               | *                     | 11.543                                    | 5.287                             | *               | **                    |
| Mes. - Vmat2 clst. of paraventricular organ | -                 | 112             | Rh. - Cerebellar-VGlut2 enriched areas         | Glut              | 130                   | 0.637 | 0.604                 | *               | *                     | 7.722                                     | 4.062                             | *               | *                     |
| Di. - Dopaminergic clst. 6 - hypothalamus   | Glut              | 11              | Di. - Pretectal Gad1b clst.                    | -                 | 64                    | 0.594 | 0.572                 | *               | *                     | 4.737                                     | 2.435                             | *               | *                     |
| Di. - Dopaminergic clst. 6 - hypothalamus   | Glut              | 11              | Mes. - Otpb clst.                              | -                 | 99                    | 0.605 | 0.568                 | *               | **                    | 4.641                                     | 2.513                             | *               | *                     |
| Mes. - Medial Tectal Band                   | -                 | 96              | Di. - Pretectal DA. clst.                      | -                 | 65                    | 0.625 | 0.615                 | *               | *                     | 14.482                                    | 9.642                             | *               | *                     |
| Mes. - Medial Tectal Band                   | -                 | 96              | Di. - Olig2 Band                               | Glut              | 43                    | 0.629 | 0.613                 | *               | *                     | 12.083                                    | 7.955                             | *               | *                     |
| Di. - Hy. 6.7FRhcrR-Gal4 clst. 1            | Glut              | 18              | Rh. - Cerebellum                               | -                 | 131                   | 0.606 | 0.586                 | *               | **                    | 4.120                                     | 2.777                             | *               | *                     |
| Di. - Hy. 6.7FRhcrR-Gal4 clst. 2            | Glut              | 19              | Rh. - Interpeduncular Nucleus                  | -                 | 176                   | 0.608 | 0.571                 | *               | **                    | 4.100                                     | 1.448                             | *               | **                    |
| Di. - Isl1 clst. 1                          | Glut              | 36              | Di. - Retinal Arborization Field 6 (AF6)       | -                 | 72                    | 0.609 | 0.569                 | *               | *                     | 9.230                                     | 4.623                             | *               | #                     |
| Di. - Migrated Area of the PreTeO. (M1)     | -                 | 41              | Tel. - Isl1 clst. 1                            | -                 | 277                   | 0.590 | 0.555                 | *               | **                    | 2.205                                     | 0.660                             | *               | *                     |

# p&lt;0.1, \* p&lt;0.05, \*\*p&lt;0.01

467  
468

**Table S3. Anatomical regions – Z-brain mask ID, short labels and abbreviations**

| <b>Z-brain mask ID</b> | <b>Anatomical labels</b>                                                   | <b>Short label (Fig 6, Fig 7, Fig S7, Table S1 &amp; S2)</b> | <b>Abbreviation (Fig1, Fig 3)</b> |
|------------------------|----------------------------------------------------------------------------|--------------------------------------------------------------|-----------------------------------|
| 1                      | u'Diencephalon -',                                                         |                                                              | Di                                |
| 4                      | u'Diencephalon - Anterior pretectum cluster of vmat2 Neurons',             | Di. - Ant. pretectum clst. of vmat2 Neurons                  |                                   |
| 5                      | u'Diencephalon - Caudal Hypothalamus',                                     |                                                              | Ca-Hy                             |
| 8                      | u'Diencephalon - Dopaminergic Cluster 2 - posterior tuberculum',           |                                                              | DA clust-2                        |
| 9                      | u'Diencephalon - Dopaminergic Cluster 3 - hypothalamus',                   | Di. - Dopaminergic clst. 3 - hypothalamus                    |                                   |
| 11                     | u'Diencephalon - Dopaminergic Cluster 6 - hypothalamus',                   | Di. - Dopaminergic clst. 6 - hypothalamus                    |                                   |
| 14                     | u'Diencephalon - Eminentia Thalami',                                       | Di - Eminentia Thalami                                       | EmT                               |
| 15                     | u'Diencephalon - Habenula',                                                | Di. - Hb.                                                    | Hb                                |
| 16                     | u'Diencephalon - Hypothalamus - Caudal Hypothalamus Neural Cluster',       | Di. - Hy. - Ca. Hy. Neural clst.                             |                                   |
| 17                     | u'Diencephalon - Hypothalamus - Intermediate Hypothalamus Neural Cluster', |                                                              | Int-Hy-Neural-clust               |
| 18                     | u'Diencephalon - Hypothalamus 6.7FRhcrR-Gal4 cluster 1',                   | Di. - Hy. 6.7FRhcrR-Gal4 clst. 1                             |                                   |
| 19                     | u'Diencephalon - Hypothalamus 6.7FRhcrR-Gal4 cluster 2',                   | Di. - Hy. 6.7FRhcrR-Gal4 clst. 2                             |                                   |
| 26                     | u'Diencephalon - Hypothalamus Qrfp neuron cluster',                        | Di. - Hy. Qrfp neuron clst                                   |                                   |
| 31                     | u'Diencephalon - Hypothalamus Vglut2 Cluster 5',                           | Di. - Hy. VGlut2 clst. 5                                     |                                   |
| 35                     | u'Diencephalon - Intermediate Hypothalamus',                               |                                                              | Int-Hy                            |
| 36                     | u'Diencephalon - Isl1 cluster 1',                                          | Di. - Isl1 clst. 1                                           |                                   |
| 38                     | u'Diencephalon - Isl1 cluster 3',                                          | Di - Isl1 cluster 3                                          |                                   |
| 39                     | u'Diencephalon - Left Habenula Vglut2 Cluster',                            | Di - Left Habenula Vglut2 Cluster                            |                                   |
| 46                     | u'Diencephalon - Otpb Cluster 1',                                          |                                                              | Otpb-clust1                       |
| 49                     | u'Diencephalon - Otpb Cluster 4',                                          |                                                              | Otpb-clust4                       |
| 50                     | u'Diencephalon - Oxtl Cluster 1 in Preoptic Area',                         |                                                              | Oxtl-clust1                       |
| 53                     | u'Diencephalon - Oxtl Cluster 4 - sparse in hypothalamus',                 |                                                              | Oxtl-clust4                       |
| 57                     | u'Diencephalon - Pituitary',                                               |                                                              | Pit                               |
| 58                     | u'Diencephalon - Posterior Tuberculum',                                    |                                                              | PT                                |
| 60                     | u'Diencephalon - Preoptic Area',                                           |                                                              | Po                                |
| 66                     | u'Diencephalon - Pretectum',                                               |                                                              | PreT                              |
| 70                     | u'Diencephalon - Retinal Arborization Field 4 (AF4)',                      |                                                              | AF4                               |
| 72                     | u'Diencephalon - Retinal Arborization Field 6 (AF6)',                      |                                                              | AF6                               |
| 94                     | u'Mesencephalon -',                                                        |                                                              | Mes                               |

|     |                                                                          |                                                |        |
|-----|--------------------------------------------------------------------------|------------------------------------------------|--------|
| 97  | u'Mesencephalon - NucMLF (nucleus of the medial longitudinal fascicle)', |                                                | nMLF   |
| 102 | u'Mesencephalon - Retinal Arborization Field 7 (AF7)',                   |                                                | AF7    |
| 103 | u'Mesencephalon - Retinal Arborization Field 8 (AF8)',                   | Mes - Retinal Arborization Field 8 (AF8)       | AF8    |
| 104 | u'Mesencephalon - Retinal Arborization Field 9 (AF9)',                   | Mes. - Retinal Arborization Field 9 (AF9)      | AF9    |
| 110 | u'Mesencephalon - Torus Semicircularis',                                 |                                                | Ts     |
| 112 | u'Mesencephalon - Vmat2 cluster of paraventricular organ',               | Mes. - Vmat2 clst. of paraventricular organ    |        |
| 114 | u'Rhombencephalon -',                                                    |                                                | Rh     |
| 124 | u'Rhombencephalon - Anterior Cluster of nV Trigeminal Motorneurons',     | Rh. - Ant. clst. of nV Trigeminal Motorneurons |        |
| 130 | u'Rhombencephalon - Cerebelluar-Vglut2 enriched areas',                  | Rh. - Cerebelluar-VGlut2 enriched areas        |        |
| 131 | u'Rhombencephalon - Cerebellum',                                         | Rh. - Cerebellum                               |        |
| 134 | u'Rhombencephalon - Eminentia Granularis',                               | Rh. - Eminentia Granularis                     |        |
| 135 | u'Rhombencephalon - Gad1b Cluster 1',                                    | Rh. - Gad1b clst. 1                            |        |
| 142 | u'Rhombencephalon - Gad1b Cluster 16',                                   | Rh. - Gad1b clst. 16                           |        |
| 146 | u'Rhombencephalon - Gad1b Cluster 2',                                    | Rh. - Gad1b clst. 2                            |        |
| 152 | u'Rhombencephalon - Gad1b Cluster 7',                                    | Rh. - Gad1b clst. 7                            |        |
| 176 | u'Rhombencephalon - Interpeduncular Nucleus',                            | Rh. - Interpeduncular Nucleus                  | IPN    |
| 201 | u'Rhombencephalon - Oculomotor Nucleus nIV',                             | Rh - Oculomotor Nucleus nIV                    |        |
| 204 | u'Rhombencephalon - Olig2 enriched areas in cerebellum',                 | Rh - Olig2 enriched areas in cerebellum        |        |
| 205 | u'Rhombencephalon - Otpb Cluster 1',                                     | Rh. - Otpb clst. 1                             |        |
| 206 | u'Rhombencephalon - Otpb Cluster 2 - locus coeruleus',                   | Rh. - Otpb clst. 2 - locus coeruleus           |        |
| 218 | u'Rhombencephalon - Raphe - Superior',                                   |                                                | SR     |
| 226 | u'Rhombencephalon - RoL-R1',                                             | Rh. - RoL-R1                                   | RoL-R1 |
| 227 | u'Rhombencephalon - RoL2',                                               |                                                | RoL2   |
| 228 | u'Rhombencephalon - RoL3',                                               |                                                | RoL3   |
| 229 | u'Rhombencephalon - RoM1',                                               |                                                | RoM1   |
| 230 | u'Rhombencephalon - RoM2',                                               | Rh - RoM2                                      |        |
| 247 | u'Rhombencephalon - Vglut2 cluster 1',                                   | Rh - Vglut2 cluster 1                          |        |
| 275 | u'Telencephalon -',                                                      |                                                | Tel    |
| 277 | u'Telencephalon - Isl1 cluster 1',                                       | Tel. - Isl1 clst. 1                            |        |
|     | Hindbrain                                                                |                                                | HB     |
|     | Reticulospinal neurons                                                   |                                                | Ro     |

470

471

472 **Video S1.** A video clip shows a free-swimming larval zebrafish in the light dark choice chamber. Recorded  
473 with infrared camera; the light zone, dark zone, and the virtual border zone are marked with light blue, dark  
474 blue, and orange rectangles respectively.

475

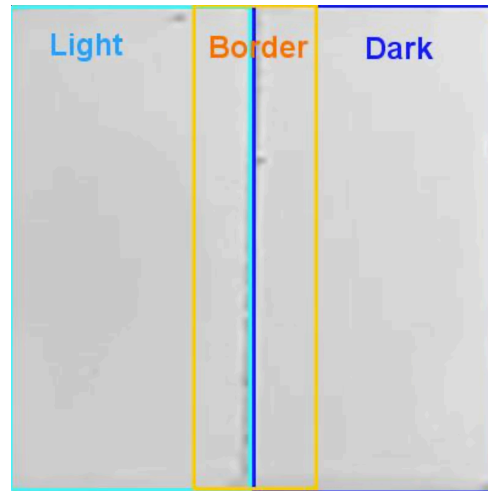

476

477 **Video S2.** A video clip shows the Imaris rendering of single hypothalamic CRF neuron project patterns.  
478 Three neurons, marked red (in Int-Hy), green (in PT), and blue (in PO) are shown.

479

480

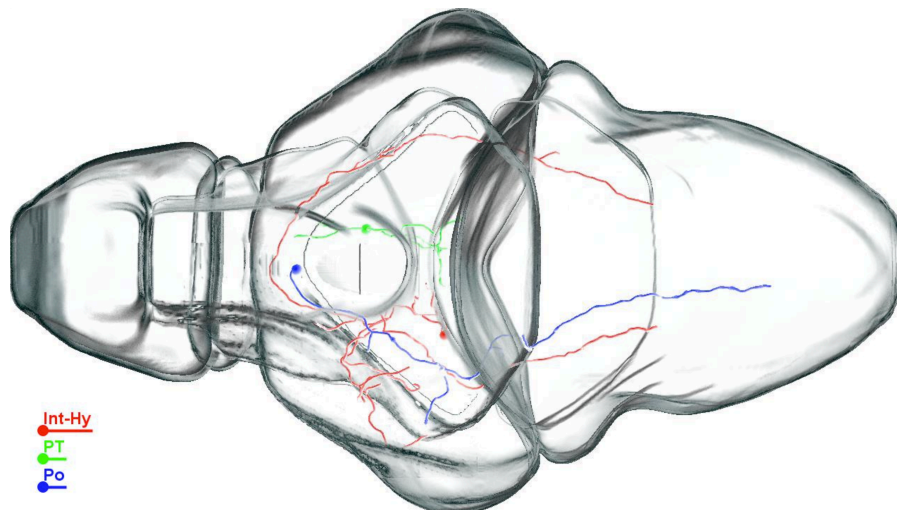

481

482

483

484  
485  
486  
487

**Video S3.** A video clip shows *in vivo* calcium imaging of a single Z-plane in a 6-7 dpf larval zebrafish brain during ~15-min. Dark period, light period, and tail movements are marked.

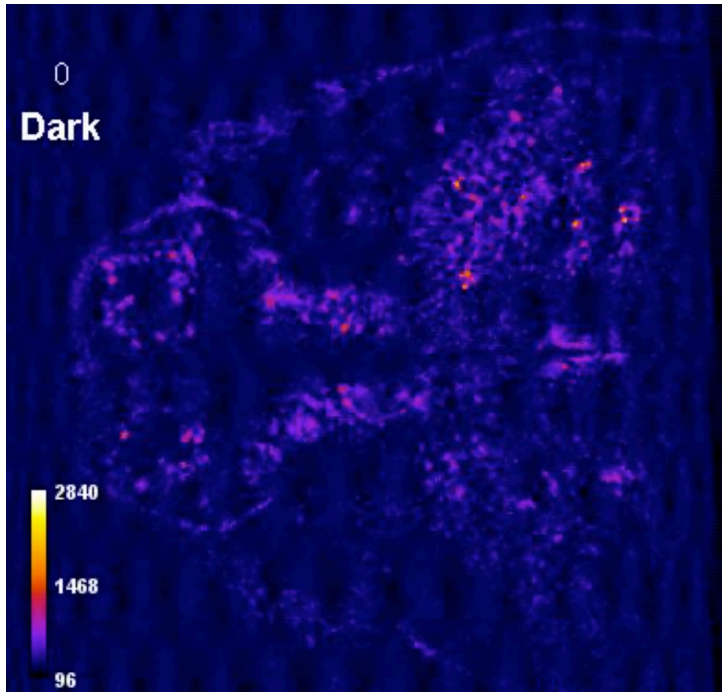

488  
489  
490  
491  
492  
493  
494

**Video S4.** A video clip shows the brain areas with increased (red) or decreased (blue) function connectivity in CRF<sup>Hy</sup> neuron-ablated subjects compared to control siblings.

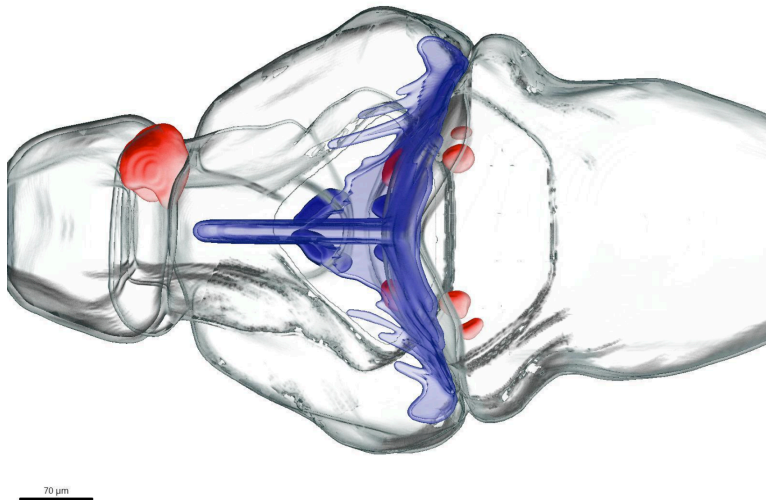

495  
496  
497
